1           **Telmisartan potentiates insulin secretion via ion channels,**  
2                           **independent of the AT1 receptor and PPAR $\gamma$**

3  
4           **Tao Liu<sup>1,2,3</sup>, Lijuan Cui<sup>1,2</sup>, Huan Xue<sup>1,2</sup>, Linping Zhi<sup>1</sup>, Xiaohua Yang<sup>1</sup>,**  
5           **Huanhuan Yang<sup>1</sup>, Mengmeng Liu<sup>1</sup>, Tao Bai<sup>1,2,4</sup>, Zhihong Liu<sup>1,2</sup>, Min Zhang<sup>5</sup>,**  
6           **Qing Guo<sup>1</sup>, Peifeng He<sup>6</sup>, Yunfeng Liu<sup>4\*</sup>, Yi Zhang<sup>1,2\*</sup>**

7  
8           <sup>1</sup>Department of Pharmacology, School of Basic Medicine, Shanxi Medical University,  
9           Taiyuan, Shanxi province, China.

10           <sup>2</sup>Key Laboratory of Cellular Physiology, Ministry of Education, Shanxi Medical  
11           University, Taiyuan, Shanxi province, China.

12           <sup>3</sup>Department of General Surgery, Shanxi Bethune Hospital, Taiyuan, Shanxi province,  
13           China.

14           <sup>4</sup>Department of Endocrinology, the First Affiliated Hospital of Shanxi Medical  
15           University, Taiyuan, Shanxi province, China.

16           <sup>5</sup>School of Pharmacy, Shanxi Medical University, Taiyuan, Shanxi province, China.

17           <sup>6</sup>School of Management, Shanxi Medical University, Taiyuan, Shanxi province,  
18           China.

19

20   **\* Corresponding authors:**

21   Yunfeng Liu, Department of Endocrinology, The first Hospital of Shanxi Medical  
22   University, Taiyuan 030001, China. Phone: +86 18703416196. Email:

23   [nectarliu@163.com](mailto:nectarliu@163.com)

24   Yi Zhang, Department of Pharmacology, Shanxi Medical University, Taiyuan 030001,  
25   China. Phone: +86 18835102847. Email: [yizhang313@163.com](mailto:yizhang313@163.com)

26

27 **Abstract**

28 Angiotensin II type 1 receptor blockers (ARBs), as antihypertensive drugs, have drawn  
29 attention for their benefits to individuals with diabetes and prediabetes. However, the  
30 effects of ARBs on insulin secretion remain unclear. Here, we investigated the  
31 insulintropic effects of ARBs (telmisartan, valsartan, and irbesartan) and the  
32 underlying electrophysiological mechanism in rat islets. We found that only telmisartan  
33 among the three ARBs exhibited an insulin secretagogue role. Distinct from other ARBs,  
34 telmisartan exerted effects on ion channels including voltage-gated potassium (Kv)  
35 channels and voltage-gated Ca<sup>2+</sup> channels to promote extracellular Ca<sup>2+</sup> influx, thereby  
36 potentiating insulin secretion in a glucose-dependent manner. We observed that the  
37 peroxisome proliferator-activated receptor  $\gamma$  pathway was not involved in these  
38 telmisartan-induced effects. Furthermore, we identified that telmisartan at least directly  
39 inhibited Kv2.1 channel through construction of a Chinese hamster ovary cell line with  
40 Kv2.1 channel overexpression. Acute exposure of type 2 diabetes model (*db/db*) mice  
41 to a telmisartan dose equivalent to therapeutic doses in humans resulted in lower blood  
42 glucose and increased plasma insulin concentration in the oral glucose tolerance test.  
43 We further observed the telmisartan-induced insulintropic and electrophysiological  
44 effects on pathological pancreatic islets isolated from *db/db* mice. Collectively, our  
45 results establish an important function of telmisartan distinct from other ARBs in the  
46 treatment of diabetes.

47 **Keywords:** telmisartan, insulin secretion, AT1 receptor, PPAR $\gamma$ , Kv channel

48

49     **Introduction**

50             Diabetes and hypertension constitute common clinical conditions that are  
51 interlinked through numerous pathophysiological mechanisms (*Deedwania, 2004;*  
52 *Ferrannini and Cushman, 2012*). In particular, hypertension substantively increases the  
53 risk of type 2 diabetes mellitus (T2DM), as revealed by a prospective cohort study  
54 wherein subjects with hypertension were almost 2.5 times more likely to develop  
55 T2DM than those with normal blood pressure (*Gress T et al., 2000*). In turn, the  
56 majority (70%–80%) of patients with T2DM also have hypertension (*Fox et al.,*  
57 *2015*). The coexistence of both conditions significantly increases the risks of developing  
58 nephropathy, heart failure, and other cardiovascular disease, leading to high rates of  
59 mortality and morbidity (*Deedwania, 2004; Ferrannini and Cushman, 2012*).  
60 Therefore, the identification of drugs that prevent both conditions would be of  
61 considerable clinical importance.

62             Growing evidences indicated that angiotensin II type 1 (AT1) receptor blockers  
63 (ARBs), an important drug class in the treatment of hypertension and heart failure,  
64 provided beneficial effects for patients with diabetes and prediabetes. Several clinical  
65 trials and retrospective-analyses have shown that ARBs reduce the incidence of new-  
66 onset diabetes among patients with hypertension and heart failure (*NAVIGATOR Study*  
67 *Group et al., 2010; Yusuf et al., 2005; Kjeldsen et al., 2006*). Moreover, it has been  
68 repeatedly demonstrated that ARBs ameliorate T2DM and its related complications  
69 such as atherosclerosis and nephropathy (*Candido et al., 2004; Makino et al., 2008;*  
70 *Viberti et al., 2002; Parving et al., 2001*). In addition, ARBs have been highly  
71 recommended in pharmacological therapy regimens for patients with both diabetes and

72 hypertension by the American Diabetes Association (*American Diabetes Association,*  
73 *2015*).

74 T2DM is a metabolic disorder syndrome characterized by insulin resistance and  
75 deficiency. The confirmed benefits of ARBs in patients with diabetes and prediabetes  
76 have been primarily attributed to blockade of the local renin–angiotensin system (RAS).  
77 ARBs suppress oxidative stress and inflammatory responses resulting from overactivity  
78 of this system, thereby protecting  $\beta$ -cells against dysfunction and improving insulin  
79 sensitivity to maintain euglycemia (*van der Zijl et al., 2011; Hunyady and Catt, 2006;*  
80 *Li et al., 2012; Nagel et al., 2006; Shiuchi et al., 2004*). However, although insufficient  
81 insulin secretion constitutes a fundamental process that determines the onset and  
82 progression of T2DM (*Weyer et al., 1999; Levy et al., 1998*), few studies have focused  
83 on the effect of ARBs on insulin secretion or its underlying mechanism.

84 In the present study, we applied three ARBs, namely telmisartan, valsartan, and  
85 irbesartan to evaluate the effects of ARBs on insulin secretion and investigate the  
86 underlying electrophysiological mechanism. Notably, our data showed that unlike other  
87 ARBs, telmisartan glucose-dependently elevated the intracellular  $[Ca^{2+}]$  ( $[Ca^{2+}]_i$ ) levels  
88 of  $\beta$ -cells through its distinctive action on ion channels, leading to enhanced insulin  
89 secretion. Our findings suggest that in addition to the typical beneficial effects of ARBs,  
90 telmisartan may serve as an insulin secretagogue in the treatment of patients with both  
91 diabetes and hypertension.

## 92 Results

### 93 *Telmisartan, but not valsartan or irbesartan, enhances glucose-stimulated insulin* 94 *secretion (GSIS)*

95 To examine the effects of ARBs on insulin secretion, firstly, isolated rat islets were  
96 treated with various doses of telmisartan. As shown in Fig. 1A, telmisartan (10 and 50  
97  $\mu\text{M}$ ) potentiated insulin secretion under 8.3 mM glucose conditions but had no effect  
98 under 2.8 mM glucose. Furthermore, the data in Fig. 1 B confirmed that telmisartan-  
99 induced insulin secretion was glucose-dependent. Next, the functions of other ARBs  
100 were evaluated. Notably, no promotion of insulin secretion was observed following  
101 treatment with valsartan and irbesartan under 8.3 and 16.7 mM glucose conditions (Fig.  
102 1, C and D, and fig. S1). Considering that telmisartan, valsartan and irbesartan are  
103 clinically available ARBs owing to their high specificity for AT1 receptors (*Michel et*  
104 *al., 2013*), our results suggested that telmisartan-mediated insulinotropic effect was  
105 independent of AT1 receptors.

### 106 107 *Telmisartan, but not valsartan or irbesartan, increases $[\text{Ca}^{2+}]_i$ concentration in $\beta$ -* 108 *cells*

109 Within  $\beta$ -cells, eliciting an increase in  $[\text{Ca}^{2+}]_i$  causes insulin granule exocytosis;  
110 therefore, the elevation in  $[\text{Ca}^{2+}]_i$  level is essential to induce insulin secretion (*Sabatini*  
111 *et al., 2019*). To verify whether the insulinotropic effect of telmisartan was related to  
112 the change in  $[\text{Ca}^{2+}]_i$ , we applied the calcium-sensitive dye Fura 2-AM to detect changes  
113 in fluorescence intensity. Telmisartan (10 and 50  $\mu\text{M}$ ) induced an acute increase in  
114 fluorescence intensity dose-dependently. Moreover, the elevation only occurred under  
115 high (11.1 and 16.7 mM) (Fig. 2 C, D, and E, F) but not low (2.8 mM) (Fig. 2 A and B)

116 glucose conditions. In addition, in the calcium imaging experiment, neither valsartan  
117 (Fig. 2 G and H) nor irbesartan (Fig. 2 I and J) increased the  $[Ca^{2+}]_i$  concentration of  $\beta$ -  
118 cells under high glucose conditions (16.7 mM).

119

120 ***Peroxisome proliferator-activated receptor  $\gamma$  (PPAR $\gamma$ ) is not involved in telmisartan-***  
121 ***induced insulin secretion and elevation of  $[Ca^{2+}]_i$  levels***

122 Telmisartan and irbesartan have also been reported to function as a partial agonist  
123 of PPAR $\gamma$  (*Schupp et al., 2004, 2005*). In view of the absence of changes in insulin  
124 secretion and  $[Ca^{2+}]_i$  levels with irbesartan, we speculated that PPAR $\gamma$  might not be  
125 responsible for the effects of telmisartan on these measures. We therefore performed  
126 the insulin secretion assay and calcium imaging experiment using GW9662, a selective  
127 PPAR $\gamma$  antagonist. As shown in Fig. 3, GW9662 alone had no effect on GSIS and  
128  $[Ca^{2+}]_i$  concentration, and the addition of GW9662 did not influence the effects of  
129 telmisartan on insulin secretion or  $[Ca^{2+}]_i$  concentration.

130

131 ***Telmisartan affects  $[Ca^{2+}]_i$  concentration through extracellular  $Ca^{2+}$  influx rather***  
132 ***than intracellular  $Ca^{2+}$  stores release***

133  $[Ca^{2+}]_i$  levels of  $\beta$ -cells are tightly maintained through the regulation of  
134 extracellular  $Ca^{2+}$  influx and the movement of  $Ca^{2+}$  within intracellular stores (*Sabatini*  
135 *et al., 2019*). We thus examined the concentration of  $[Ca^{2+}]_i$  in the absence of  
136 extracellular  $Ca^{2+}$  to study the pathway by which telmisartan increases  $[Ca^{2+}]_i$   
137 concentration. Calcium imaging (Fig. 4 A and B) showed that telmisartan-induced  
138 elevation of  $[Ca^{2+}]_i$  levels was reversed in  $Ca^{2+}$ -free KRBH medium, although the

139  $[Ca^{2+}]_i$  level was considerably increased upon intracellular  $Ca^{2+}$  mobilization via  
140 thapsigargin.

141 Moreover, telmisartan-induced effects on  $[Ca^{2+}]_i$  levels were monitored following  
142 the application of azelnidipine, an L-type voltage-gated  $Ca^{2+}$  channel (VGCC) blocker.  
143 We observed that the increase in  $[Ca^{2+}]_i$  levels with telmisartan was completely blocked  
144 by azelnidipine, supporting that telmisartan enhances extracellular calcium influx  
145 through L-type VGCCs. Conversely, significant elevation remained upon thapsigargin  
146 addition (Fig. 4 C and D), confirming the lack of telmisartan effect on intracellular  
147 calcium stores.

148

149 *Telmisartan inhibits voltage-gated potassium (Kv) channels, and prolongs action*  
150 *potential durations (APDs) in  $\beta$ -cells*

151 Pancreatic  $\beta$ -cells are electrically excitatory. Previous studies have demonstrated  
152 that Kv channels play an important role in GSIS and glucose-stimulated increase of  
153  $[Ca^{2+}]_i$  (*Herrington et al., 2006; Roe et al., 1996; MacDonald and Wheeler, 2003*);  
154 therefore, we applied patch-clamp techniques to explore the effects of telmisartan on  
155 the Kv channels of  $\beta$ -cells. Fig 5 A and B illustrate that telmisartan decreased the Kv  
156 channel currents compared with that of controls.

157 Kv channels participate in the repolarization of action potentials of  $\beta$ -cells, so  
158 that inhibition of Kv channels delays the repolarization, thus prolonging the APD,  
159 namely the duration of extracellular  $Ca^{2+}$  influx (*Herrington et al., 2006; MacDonald*  
160 *and Wheeler, 2003; Jacobson and Philipson, 2007*). Therefore, we next recorded the  
161 action potentials in current-clamp mode to observe the effect of telmisartan on APD. As

162 presented in Fig. 5 C, comparison of APDs with or without telmisartan indicated that  
163 telmisartan extended APD.

164 ***Telmisartan directly inhibits Kv2.1 channels independent of AT1 receptor and PPAR $\gamma$***

165 We evaluated the effects of valsartan and irbesartan in the voltage-clamp  
166 experiment. Neither valsartan nor irbesartan exhibited similar effects on Kv channels  
167 as those observed with telmisartan treatment (Fig. 6 A and B). Moreover, GW9662  
168 addition did not influence the telmisartan-induced inhibition of Kv channels (Fig. 6 C  
169 and D). The results indicated that telmisartan inhibited Kv channels independent of the  
170 AT1 receptor and PPAR $\gamma$ .

171 We therefore hypothesized that telmisartan might directly inhibit Kv channels. As  
172 the Kv2.1 channel constitutes the main subtype among Kv families involved in the  
173 regulation of insulin release by  $\beta$ -cells (*MacDonald P et al., 2001; Li et al., 2013;*  
174 *Jacobson et al., 2007*), we carried out patch-clamp experiments to determine whether  
175 telmisartan directly inhibited Kv2.1 channels. Chinese hamster ovary (CHO) cells,  
176 which do not express any endogenous Kv channels (*Yu and Kerchner, 1998*), were  
177 utilized to establish the Kv2.1-overexpressing CHO-Kv2.1 cell line. Under whole-cell  
178 voltage-clamp mode, Kv2.1 channel currents and their suppression by telmisartan were  
179 both detected in CHO-Kv2.1 cells (Fig. 6 E, and F), suggesting that telmisartan exerted  
180 direct inhibition on Kv2.1 channels.

181 ***Telmisartan activates VGCCs independent of the AT1 receptor and PPAR $\gamma$***

182 To further confirm whether Kv channels alone are involved in mediating  
183 telmisartan-induced insulin secretion and increase of  $[Ca^{2+}]_i$  levels,



184 tetraethylammonium chloride (TEA), a potent inhibitor of Kv channels, was employed  
185 in pancreatic  $\beta$ -cells. Previous studies have shown that 20 mM TEA blocks the majority  
186 of Kv channels and causes calcium elevation (*Roe et al., 1996; MacDonald P et al.,*  
187 *2001*). As shown in Fig. 7A, TEA stimulated insulin secretion under 11.1 mM glucose  
188 conditions and telmisartan still significantly promoted insulin secretion in the presence  
189 of TEA, indicating that other factors may participate in telmisartan-stimulated insulin  
190 secretion. Consistent with this results, telmisartan also enhanced the  $[Ca^{2+}]_i$   
191 concentration in the presence of TEA under 11.1 mM glucose conditions (Fig. 7 B and  
192 C).

193 As telmisartan enhances extracellular calcium influx through VGCCs, we  
194 performed patch-clamp experiments to observe the effects of telmisartan on VGCCs in  
195 pancreatic  $\beta$ -cells. As presented in Fig. 7 D and E, telmisartan increased voltage-  
196 dependent inward  $Ca^{2+}$  currents densities compared with those of controls. In addition,  
197 no significant difference was observed when VGCC currents were recorded following  
198 treatment with valsartan or irbesartan (fig. S2, A and B); telmisartan-induced activation  
199 was not inhibited by GW9662 co-administration (fig. S2, C and D). The results thus  
200 demonstrated that telmisartan also activated VGCCs of  $\beta$ -cells; moreover, neither the  
201 AT1 receptor nor the PPAR $\gamma$  mediated this effect.

202 ***Telmisartan ameliorates hyperglycemia by increasing insulin secretion in vivo and***  
203 ***amplifies GSIS in vitro in db/db mice***

204 We applied db/db mice as T2DM model mice to determine whether telmisartan  
205 induced hypoglycemic effects in vivo. Male mice were administered with telmisartan

206 (15 mg/kg) or vehicle once by gavage at the age of 8 and 11 weeks, then the oral glucose  
207 tolerance test (OGTT) was performed to observe the effects of telmisartan on glucose  
208 response.

209 In 8-week-old mice, blood glucose levels monitoring revealed that glucose  
210 clearance at 30 min and thereafter was improved significantly in telmisartan-treated  
211 mice, and noticeable difference was observed when the glycemic response was  
212 measured via the area under the curve (AUC) compared with that of control (Fig. 8 A).  
213 However, although the time of peak blood glucose was similarly advanced to 15 min in  
214 11-week-old mice, it was not until 90 min and 120 min (approximately 1 h later than in  
215 8-week-old mice) that the blood glucose values were markedly lower than those of  
216 controls. Additionally, the AUC results showed no significant difference between the  
217 groups (Fig. 8 B). Furthermore, the levels of plasma insulin in the telmisartan-treated  
218 group were considerably higher than those in the control group at 15, 30, and 60 min  
219 with the AUC differing significantly between the groups (Fig. 8 C). Therefore, the  
220 glucose-lowering effect of telmisartan was accompanied by the increase in the levels of  
221 plasma insulin, suggesting that the hypoglycemic effects of telmisartan were a result of  
222 increased insulin secretion. We speculated that the glucose-lowering effect of  
223 telmisartan was delayed and weakened in 11-week-old mice, possibly owing to the  
224 progression of insulin resistance and the deterioration of  $\beta$ -cell function in *db/db* mice.

225 At the end of the experiment, islets were isolated from *db/db* mice and used for an  
226 ex vivo study. The results showed that telmisartan potentiated insulin secretion under  
227 16.7 and 30 mM glucose conditions (Fig. 8 D). Consistent with the results of in vivo

228 studies, telmisartan treatment similarly enhanced GSIS under the pathological  
229 condition of diabetes. However, GSIS in cultured islets only occurred under 30 mM  
230 glucose conditions whereas 2.8 and 16.7 mM glucose showed equivalent secretion. The  
231 bluntness of GSIS might be related to impaired  $\beta$ -cell function caused by long-term  
232 exposure to high glucose and lipids in the development of diabetes in the db/db mice  
233 (*Olofsson et al., 2007*).

234 In T2DM, high glucose and free fatty acids leads to adverse effects (including  
235 blunted GSIS and decreased cell viability) (*Olofsson et al., 2007; Tan et al., 2013*), with  
236 the modulation of Kv and voltage-gated  $Ca^{2+}$  channels by “glucolipotoxicity” also being  
237 involved (*Hoppa et al., 2011; Lee et al., 2018*). We next performed the patch-clamp  
238 experiments to ascertain whether telmisartan exerted similar electrophysiological  
239 effects on pathological  $\beta$ -cells. We observed that both the decreased Kv channel  
240 currents (fig. S3, A and B) and increased VGCC currents (fig. S3, C and D) remained  
241 in telmisartan-treated  $\beta$ -cells of db/db mice. Therefore, under the pathological condition  
242 of T2DM, telmisartan still served the function of an insulin secretagogue through its  
243 action on ion channels.

244

245

246

247

248 **Discussion**

249 ARBs are of critical importance to individuals with both diabetes and hypertension.  
250 We therefore carried out the study to better understand the beneficial effects of ARBs  
251 for diabetes. Notably, we revealed an insulin secretagogue role for telmisartan, which  
252 is not present in other ARBs. In the present study, isolated islets were exposed to  
253 telmisartan for only 30 minutes prior to the insulin secretion assay, and glucose-  
254 lowering effects were observed in db/db mice following acute telmisartan  
255 administration. The evidences both in vitro and in vivo thus demonstrated the rapid  
256 insulinotropic effect of telmisartan. To the best of our knowledge, no prior reports of  
257 telmisartan exist with respect to this direct effect on insulin secretion.

258 Moreover, our results showed that telmisartan, enhances insulin secretion in a  
259 glucose-dependent manner. Even at high concentrations (50  $\mu$ M), no insulinotropic  
260 effect of telmisartan was observed under low glucose conditions (2.8 mM) (Fig. 1A).  
261 This indicated that telmisartan might be applied as an insulin secretagogue without the  
262 risk of hypoglycemia. Hypoglycemia is a frequent and severe adverse effect. Not only  
263 can apparent hypoglycemia cause coma or the disruption of daily life, but unrecognized,  
264 recurrent hypoglycemia can also lead to life-threatening cardiac complications such as  
265 arrhythmias and myocardial ischemia, and cause permanent cognitive impairment that  
266 may accelerate the onset of dementia (*Frier, 2014*). In addition, emerging evidence  
267 suggests that forcing the  $\beta$ -cells to secrete insulin constantly, termed insulin  
268 hypersecretion, might have the potential to accelerate the decline in  $\beta$ -cell function and  
269 thus may constitute a contributing factor to the progression of T2DM (*Rustenbeck et*

270 *al., 2010; Aston-Mourney et al., 2008*). Therefore, glucose-independent insulinotropic  
271 agents have exhibited poor durability in maintaining long-term glycemic control  
272 (*Kahn et al., 2006*). In comparison, our study showed that telmisartan increased insulin  
273 secretion in a manner proportional to the accumulating glucose concentration, thereby  
274 avoiding the risk of overstimulating the  $\beta$ -cells.

275 By means of its function as both an ARB and a partial agonist for PPAR- $\gamma$ ,  
276 telmisartan provides numerous beneficial effects in ameliorating T2DM and related  
277 complications (*Makino et al., 2008; Li et al., 2012; Nagel et al., 2006; Hasegawa et al.,*  
278 *2009; Saitoh et al., 2009; Yamana et al., 2008; Perl et al., 2010; Goyal et al., 2008*).  
279 However, our results demonstrated that telmisartan also functioned rapidly as an insulin  
280 secretagogue, consequent to its unique electrophysiological effects on ion channels,  
281 which were independent of the AT1 receptor and PPAR $\gamma$ .

282 Glucose-induced insulin secretion and increase of  $[Ca^{2+}]_i$  are tightly controlled by  
283 ion channels that regulate cell membrane potential. The closure of ATP-sensitive  
284 potassium ( $K_{ATP}$ ) channels caused by high glucose results in membrane depolarization  
285 and opening of Kv channels and VGCCs (*Sabatini et al., 2019; Kalwat and Cobb,*  
286 *2017*). Kv channels mediate repolarization of  $\beta$ -cells, and antagonize the  $Ca^{2+}$  influx  
287 induced by VGCC activation. Blockade of Kv channels therefore prolongs action  
288 potential duration, leading to an increase of insulin secretion. In support of this notion,  
289 here we found that inhibition of Kv channels was linked to telmisartan-induced  
290 augmentation of GSIS.

291 Moreover, we identified that telmisartan directly inhibited Kv2.1 channel. The

292 Kv2.1 channel, as a Kv family member, accounts for the majority of Kv currents on  $\beta$ -  
293 cells, serving to not only negatively regulate GSIS but also potentiate  $\beta$ -cell apoptosis  
294 (*Kim et al., 2012; Tingting et al., 2018*). Previous studies attributed telmisartan-induced  
295 protective effects against  $\beta$ -cells apoptosis and dysfunction to its action on the AT1  
296 receptor and PPAR $\gamma$ (*Li et al., 2012; Hasegawa et al., 2009; Saitoh et al., 2009; Wang*  
297 *et al., 2019*), however, our results indicated that the inhibition of Kv2.1 might also be  
298 involved. Moreover, based on its dual effects including regulation of insulin secretion  
299 and  $\beta$ -cell apoptosis, Kv2.1 is considered as a promising therapeutic target for T2DM  
300 by most researchers in the field. However, despite the occasional reports of small  
301 molecule Kv2.1 inhibitor(*Tingting et al., 2018; Zhou et al., 2016*), no specific drugs  
302 have been developed for therapeutic use. Alternatively, as drug repurposing has become  
303 a successful approach to accelerate novel anti-diabetic drug development(*Turner et al.,*  
304 *2016*), our favorable finding provides insight with regard to new options for anti-  
305 diabetic drug discovery. Furthermore, as Kv2.1 also serves as the key channel during  
306 neuronal apoptosis and its cleavage inhibits neuronal apoptosis (*Liu et al., 2018; Yao et*  
307 *al., 2009*), the potential neuroprotective role of telmisartan also warrants further  
308 investigation. It should be noted here that there are many isoforms of the Kv channel  
309 contributing to the regulation of GSIS in  $\beta$ -cells (*MacDonald P et al., 2001*);  
310 Accordingly, our data did not exclude the possibility that telmisartan also interacts with  
311 other Kv channel isoforms.

312 Of note, although the potent Kv channel inhibitor TEA blocks the majority of Kv  
313 channels, we found that telmisartan showed a more effective potentiation on insulin

314 secretion and  $[Ca^{2+}]_i$  concentration in the presence of TEA. Indeed, our findings  
315 revealed that in addition to Kv channels, VGCCs mediated the effects of telmisartan,  
316 which were also independent of the AT1 receptor and PPAR $\gamma$ . Moreover, we concluded  
317 that  $K_{ATP}$  channels were unlikely to be involved in telmisartan -regulated insulin  
318 secretion for several reasons. Specifically, the insulinotropic effect of inhibition of  $K_{ATP}$   
319 channels is glucose-independent (*Dukes et al., 1994; Henquin, 2011*), whereas  
320 telmisartan did not enhance insulin secretion under low glucose (2.8 mM) conditions  
321 (Fig. 1A and D). Conversely, the  $K_{ATP}$  antagonist tolbutamide increased  $[Ca^{2+}]_i$   
322 concentrations in  $\beta$ -cells under low glucose conditions (Fig. 2 A and B), suggesting that  
323 telmisartan and tolbutamide act on separate targets.

324 In summary, our results showed that beyond AT1 receptor blockade or PPAR $\gamma$   
325 activation, telmisartan also inhibits Kv channels and activates VGCCs to promote  
326 extracellular  $Ca^{2+}$  influx, thereby enhancing  $[Ca^{2+}]_i$  levels and amplifying GSIS. Our  
327 findings provide a new understanding of an anti-diabetes mechanism for telmisartan  
328 that is distinct from that of other ARBs, and may have important implications for  
329 determination of the choice of ARBs for the treatment of patients with both  
330 hypertension and diabetes. In addition, our identification of telmisartan also acting as a  
331 Kv2.1 inhibitor and glucose-dependent insulinotropic agent, provides a foundation for  
332 the development of new anti-diabetic drugs.

333

## 334 **Methods**

### 335 *Animals*

336 Adult male Wistar rats, weighing 240–260 g, were purchased from Beijing  
337 Weitong Lihua experimental animal center (Beijing, PR China). Five-week-old male  
338 diabetic *db/db* mice (BKS -  $Lepr^{em2Cd479}/Gpt$ , stock number T002407) were obtained  
339 from GemPharmatech Co.,Ltd (Nanjing, China). Rats and mice were maintained in  
340 specific-pathogen-free surroundings, with a 12 h-light/dark cycles under controlled  
341 temperature ( $22 \pm 2^\circ\text{C}$ ) and humidity (55–60%) conditions, and with free access to  
342 water and food. All animal care and experimental procedures conformed to the ethical  
343 guidelines for animal research at Shanxi Medical University and were approved by the  
344 Animal Care and Use Committee of Shanxi Medical University (Taiyuan, China).

### 345 *culture of islets and cells*

346 The rat pancreas was isolated following injection of 1 mg/mL collagenase P (Roche,  
347 Indianapolis, IN, USA) through the common bile duct. After digestion at  $37^\circ\text{C}$  for 11  
348 min and density gradient centrifugation with Histopaque-1077 (Sigma-Aldrich,  
349 St.Louis, MO, USA) for 23 min, the expanded pancreas was dispersed, and islets  
350 remaining in the supernatant separated from the sediment. The islets were hand-  
351 collected under a dissection microscope, and single islet cells were obtained from islets  
352 using Dispase II (Roche, Indianapolis, USA) digestion. The *db/db* mouse islets were  
353 similarly obtained, although the pancreas was injected with 1 mg/mL collagenase V  
354 (Roche, Indianapolis, USA), then digested for 16 min and centrifuged twice with Hanks  
355 Balanced Salt Solution. Isolated islets and cells were cultured in RPMI 1640 (Hyclone,



356 Thermo Scientific, Waltham, MA, USA) medium containing 11.1 mM glucose,  
357 supplemented with 10% fetal bovine serum, 1% penicillin and streptomycin at 37 °C in  
358 a humidified atmosphere of 5% CO<sub>2</sub>, 95% air.

359 Chinese hamster ovary (CHO) cells were obtained from the National Infrastructure  
360 of Cell Line Resource (Beijing, China). Lentivirus vectors overexpressing voltage-  
361 dependent potassium (Kv) 2.1 channels were constructed (Shanghai Genechem Co.,  
362 Ltd., Shanghai, China) to transfect CHO cells, and the CHO-Kv2.1 cell line was  
363 established. CHO-Kv2.1 cells were cultured in Dulbecco's modified Eagle's medium  
364 (Hyclone, Thermo Scientific, Waltham, MA, USA) containing 4500 mg/L glucose in  
365 addition to 10% fetal bovine serum, 1% penicillin and streptomycin and 0.5 µg/mL  
366 puromycin (Beijing Solarbio Science & Technology Co., Ltd., Beijing, China). CHO  
367 cells were cultured under similar conditions except for puromycin selection.

#### 368 *Insulin secretion assay*

369 Handpicked separated islets were cultured for 1–2 days before the experiment. A  
370 total of five islets per tube were pre-incubated in Krebs Ringer bicarbonate- HEPES  
371 (KRBH) buffer under 2.8 mM glucose conditions for 30 min. The KRBH buffer  
372 contained 128.8 mM NaCl, 4.8 mM KCl, 1.2 mM KH<sub>2</sub>PO<sub>4</sub>, 1.2 mM MgSO<sub>4</sub>, 2.5 mM  
373 CaCl<sub>2</sub>, 5 mM NaHCO<sub>3</sub>, and 10 mM HEPES, adjusted to pH 7.4 with NaOH prior to the  
374 addition of 2% bovine serum albumin. Islets were then treated with different drugs and  
375 glucose conditions as indicated, and supernatant liquid was collected at the end of every  
376 30 min incubation, and stored at –20 °C for insulin concentration measurement. Insulin  
377 secretion was determined using an Iodine [<sup>125</sup>I] Insulin Radioimmunoassay Kit (North

378 Biological Technology Research Institute of Beijing).

379 *Calcium imaging technology*

380 Calcium imaging was carried out at 28–30 °C using the calcium-sensitive dye Fura  
381 2-AM (Dojindo Laboratories, Kumamoto, Japan), using an OLYMPUS IX71 inverted  
382 microscope and Meta Fluor software 7.8 (Molecular Devices, Sunnyvale, CA, USA).  
383 Islet cells were cultured on coverslips coated with adhesion reagent for 6–10 hour, then  
384 were loaded with 2 μM Fura 2-AM in KRBH buffer with addition of 2.8 mM glucose  
385 for 30 min at 37 °C. Subsequently, the loading buffer was removed, and cells were  
386 washed twice with KRBH solution to remove excessive fluorescent dye. Fura-2 was  
387 excited at 340 and 380 nm wavelengths in 1 s intervals with fluorescence emission  
388 detected at 510–520 nm wavelengths. The ratio of fluorescence intensity (F340/F380)  
389 was recorded to measure intracellular Ca<sup>2+</sup> concentrations.

390 Fura 2-AM-loaded islet cells on coverslips were transferred to a glass chamber  
391 containing KRBH buffer with appropriate glucose conditions. Between each test, the  
392 reagent was dripped onto the coverslip and F340/F380 data points were acquired to  
393 monitor the changes of intracellular Ca<sup>2+</sup> level. The average value during 30 s  
394 F340/F380 spikes (15 s before and after the peak of F340/F380) for each test was used  
395 to compare the change of Ca<sup>2+</sup> concentrations under different treatments, unless  
396 otherwise stated.

397 *Electrophysiology*

398 Whole-cell recording patch-clamp technology was applied to detect voltage-  
399 activated currents and record action potentials using an EPC-10 amplifier and PULSE

400 software from HEKA Elektronik (Lambrecht, Germany) at room temperature. Islet cells  
401 were cultured on glass coverslips coated with cell adherent reagent (Applygen  
402 Technologies Inc., Beijing, China).

403 In voltage-clamp mode, to record Kv currents, patch pipettes (5–8M $\Omega$ ) were  
404 loaded with intracellular solution containing 10 mM NaCl, 1 mM MgCl<sub>2</sub>, 0.05 mM  
405 EGTA, 140 mM KCl, 0.3 mM Mg-ATP, and 10 mM HEPES, pH 7.25 adjusted with  
406 KOH. Cells were transferred to a recording chamber containing extracellular solution  
407 consisting of 138 mM NaCl, 5.6 mM KCl, 1.2 mM MgCl<sub>2</sub>·6H<sub>2</sub>O, 2.6 mM CaCl<sub>2</sub>, 11.1  
408 mM glucose, and 5 mM HEPES (pH 7.4 adjusted with NaOH). The  $\beta$ -cells were  
409 identified by cell capacitance (>7 pF) (*Göpel et al., 1999*) and were clamped to a holding  
410 potential of –70 mV, then test potentials were elicited by ranging from –70 mV to 80  
411 mV in 10 mV steps for 400 ms.

412 For voltage-gated Ca<sup>2+</sup> channel (VGCC) currents, the intracellular solution  
413 contained: 120 mM CsCl, 20 mM TEA (Sigma-Aldrich), 5 mM MgATP, 1 mM MgCl<sub>2</sub>,  
414 0.05 mM EGTA, and 10 mM HEPES (pH 7.25 adjusted with CsOH). The extracellular  
415 solution consisted of: 100 mM NaCl, 20 mM TEA, 20 mM BaCl<sub>2</sub>, 4 mM CsCl, 1 mM  
416 MgCl<sub>2</sub>, 5 mM HEPES, and 3 mM glucose (pH 7.4 adjusted with NaOH). Ca<sup>2+</sup> was  
417 replaced with Ba<sup>2+</sup> as the charge carrier in the extracellular solution to eliminate Ca<sup>2+</sup>-  
418 dependent inactivation of the VGCCs.  $\beta$ -cells were clamped to a holding potential of  
419 –70 mV, and then elicited by test potentials of –50 mV to 30 mV in 10 mV steps for 50  
420 ms.

421 In current-clamp mode,  $\beta$ -cells were elicited by 4 ms currents of 150 pA to record

422 action potentials. The time between the initiation and the point where membrane  
423 potential returned to within 10 mV of the resting membrane potential, was considered  
424 to be the measurement of action potential duration.

#### 425 *In vivo evaluation of mice and drug administration*

426 At the age of 8 weeks, the mice were given fasting glucose teste to ensure that  
427 diabetes models were successfully established. Given that a therapeutic doses of  
428 telmisartan are 40–80 mg/day in humans, the conversion for mice was approximately  
429 8.2–16.4 mg/kg of body weight (*Nair and Jacob, 2016*). In our experiment, the mice  
430 were administered acute oral acute oral telmisartan treatment at 15 mg/kg of body  
431 weight. At 2 hours following drug intake, when the onset of action of telmisartan  
432 reached a maximum, oral glucose tolerance test (OGTT) was performed (*Gohlke et al.,*  
433 *2001*).

#### 434 *OGTT*

435 At the age of 8 weeks, following overnight fasting (14 h), the mice were  
436 randomly divided into groups receiving treatment with telmisartan (in drinking water  
437 containing 0.5% carboxymethyl cellulose sodium salt) or vehicle by gavage. For  
438 OGTTs, groups of mice were fed with glucose at 1.5 g/kg body weight orally, then a  
439 blood sample was collected from the tail vein and glucose levels were assessed using a  
440 Sinocare Glucometer (Changsha, China) at baseline (0 minute) and after 15, 30, 60, 90,  
441 and 120 min. At the age of 11 weeks, the mice were treated as described above and  
442 additional blood samples (50  $\mu$ L) were obtained in a heparinized microhematocrit tube  
443 at 0, 15, 30, 60, 90, and 120 min. After centrifugation, the plasma was collected for

444 insulin concentration measurement using the Mercodia Mouse Insulin ELISA (stock  
445 number 10-1247-01, Uppsala, Sweden).

446 *Statistical analysis*

447 All experimental data are presented as the means  $\pm$  SEM.  $P < 0.05$  was considered  
448 to indicate statistical significance. Shapiro–Wilk tests were used to analyze the  
449 normality of the data. Upon normal distribution, the means of numerical variables were  
450 compared using the Student’s *t* test or one-way analysis of variance (ANOVA), whereas  
451 data with non-normal distribution were analyzed using the Mann–Whitney Rank Sum  
452 Test or Kruskal–Wallis one-way ANOVA on Ranks. If any statistically significant  
453 difference was detected among three or more groups, the Student–Newman–Keuls  
454 method or Tukey test was performed for post hoc comparisons, unless otherwise stated.

455

456

457

458 **Acknowledgements**

459 This work was supported by NSFC (81670710; 81770776; 81973378), 136 project in  
460 Shanxi Bethune Hospital(2019XY015), Cultivate Scientific Research Excellence  
461 Programs of Higher Education Institutions in Shanxi (2019KJ022).This research  
462 project was supported by Shanxi Scholarship Council of China (2017-053), FSKSC and  
463 1331KSC, Department of Education Innovation Project in Shanxi Province  
464 (2019BY078), and Shanxi Youth Science and Technology Research Fund  
465 (201901D211323).

466

467 **Author contributions**

468 Y. Z., Y. L. and T. L. conceived and designed the study; T. L. performed the ex vivo  
469 experiments with assistance from L. C., H. X., X. Y., M .L., T. B., Z. L., and Q.G.; T. L.,  
470 L. C., H. Y., and L. Z. carried out the in vivo experiments; T. L., M. Z., and P. H. analyzed  
471 the data. T. L., Y. Z., and Y. L. wrote the manuscript.

472

473 **Competing interests**

474 All authors declare that they have no competing interests, and approve the final  
475 manuscript.

476

## References

477

478

479 Aston-Mourney K, Proietto J, Morahan G, Andrikopoulos S. 2008. Too much of a good thing: why it is bad to  
480 stimulate the beta cell to secrete insulin. *Diabetologia* **51**:540-545. doi: 10.1007/s00125-008-0930-2, PMID:  
481 18246324

482 Candido R, Allen TJ, Lassila M, Cao Z, Thallas V, Cooper ME, Jandeleit-Dahm KA. 2004. Irbesartan but not  
483 amlodipine suppresses diabetes-associated atherosclerosis. *Circulation* **109**:1536-1542. doi:  
484 10.1161/01.CIR.0000124061.78478.94, PMID: 15023892

485 American Diabetes Association. 2015. Standards of medical care in diabetes-2015 abridged for primary care  
486 providers. *Clinical diabetes : a publication of the American Diabetes Association* **33**:97-111. doi:  
487 10.2337/diaclin.33.2.97, PMID: 25897193

488 NAVIGATOR Study Group, McMurray JJ, Holman RR, Haffner SM, Bethel MA, Holzhauer B, Hua TA, Belenkov  
489 Y, Boolell M, Buse JB, Buckley BM, Chacra AR, Chiang FT, Charbonnel B, Chow CC, Davies MJ,  
490 Deedwania P, Diem P, Einhorn D, Fonseca V, Fulcher GR, Gaciong Z, Gaztambide S, Giles T, Horton E,  
491 Ilkova H, Jenssen T, Kahn SE, Krum H, Laakso M, Leiter LA, Levitt NS, Mareev V, Martinez F, Masson C,  
492 Mazzone T, Meaney E, Nesto R, Pan C, Prager R, Raptis SA, Rutten GE, Sandstroem H, Schaper F, Scheen  
493 A, Schmitz O, Sinay I, Soska V, Stender S, Tamás G, Tognoni G, Tuomilehto J, Villamil AS, Vozár J, Califf  
494 RM. 2010. Effect of valsartan on the incidence of diabetes and cardiovascular events. *The New England*  
495 *journal of medicine* **362**:1477-1490. doi: 10.1056/NEJMoa1001121, PMID: 20228403

496 Deedwania PC. 2004. Diabetes and hypertension, the deadly duet: importance, therapeutic strategy, and selection of  
497 drug therapy. *Cardiology clinics* **23**.

498 Dukes ID, McIntyre MS, Mertz RJ, Philipson LH, Roe MW, Spencer B, Worley JF 3rd. 1994. Dependence on NADH  
499 produced during glycolysis for beta-cell glucose signaling. *The Journal of biological chemistry* **269**:10979-  
500 10982. PMID: 8157622

501 Ferrannini E, Cushman WC. 2012. Diabetes and hypertension: the bad companions. *The Lancet* **380**.

502 Fox CS, Golden SH, Anderson C, Bray GA, Burke LE, de Boer IH, Deedwania P, Eckel RH, Ershow AG, Fradkin  
503 J, Inzucchi SE, Kosiborod M, Nelson RG, Patel MJ, Pignone M, Quinn L, Schauer PR, Selvin E, Vafiadis  
504 DK, American Heart Association Diabetes Committee of the Council on Lifestyle and Cardiometabolic  
505 Health, Council on Clinical Cardiology, Council on Cardiovascular and Stroke Nursing CoCSaA, Council  
506 on Quality of Care and Outcomes Research atADA. 2015. Update on Prevention of Cardiovascular Disease  
507 in Adults With Type 2 Diabetes Mellitus in Light of Recent Evidence: A Scientific Statement From the  
508 American Heart Association and the American Diabetes Association. *Circulation* **132**:691-718. doi:  
509 10.1161/CIR.000000000000230, PMID: 26246173

510 Frier BM. 2014. Hypoglycaemia in diabetes mellitus: epidemiology and clinical implications. *Nature reviews.*  
511 *Endocrinology* **10**:711-722. doi: 10.1038/nrendo.2014.170, PMID: 25287289

512 Gohlke P, Weiss S, Jansen A, Wiene W, Stangier J, Rascher W, Culman J, Unger T. 2001. AT1 receptor antagonist  
513 telmisartan administered peripherally inhibits central responses to angiotensin II in conscious rats. *The*  
514 *Journal of pharmacology and experimental therapeutics* **298**:62-70. PMID: 11408526

515 Goyal BR, Mesariya P, Goyal RK, Mehta AA. 2008. Effect of telmisartan on cardiovascular complications associated  
516 with streptozotocin diabetic rats. *Molecular and cellular biochemistry* **314**.

517 Gress T W, Nieto F J, Shahar E, Wofford M R, Brancati F L. 2000. Hypertension and antihypertensive therapy as  
518 risk factors for type 2 diabetes mellitus. Atherosclerosis Risk in Communities Study. *The New England*  
519 *journal of medicine* **342**.

- 520 Göpel S, Kanno T, Barg S, Galvanovskis J, Rorsman P. 1999. Voltage-gated and resting membrane currents recorded  
521 from B-cells in intact mouse pancreatic islets. *The Journal of physiology* **521 Pt 3**:717-728. doi:  
522 10.1111/j.1469-7793.1999.00717.x, PMID: 10601501
- 523 Hasegawa G, Fukui M, Hosoda H, Asano M, Harusato I, Tanaka M, Shiraishi E, Senmaru T, Sakabe K, Yamasaki  
524 M, Kitawaki J, Fujinami A, Ohta M, Obayashi H, Nakamura N. 2009. Telmisartan, an angiotensin II type 1  
525 receptor blocker, prevents the development of diabetes in male Spontaneously Diabetic Torii rats. *European*  
526 *journal of pharmacology* **605**:164-169. doi: 10.1016/j.ejphar.2009.01.001, PMID: 19171132
- 527 Henquin JC. 2011. The dual control of insulin secretion by glucose involves triggering and amplifying pathways in  
528  $\beta$ -cells. *Diabetes research and clinical practice* **93 Suppl 1**:S27-31. doi: 10.1016/S0168-8227(11)70010-9,  
529 PMID: 21864748
- 530 Herrington J, Zhou YP, Bugianesi RM, Dulski PM, Feng Y, Warren VA, Smith MM, Kohler MG, Garsky VM,  
531 Sanchez M, Wagner M, Raphaelli K, Banerjee P, Ahaghotu C, Wunderler D, Priest BT, Mehl JT, Garcia ML,  
532 McManus OB, Kaczorowski GJ, Slaughter RS. 2006. Blockers of the delayed-rectifier potassium current in  
533 pancreatic beta-cells enhance glucose-dependent insulin secretion. *Diabetes* **55**:1034-1042. doi:  
534 10.2337/diabetes.55.04.06.db05-0788, PMID: 16567526
- 535 Hoppa MB, Collins S, Ramracheya R, Hodson L, Amisten S, Zhang Q, Johnson P, Ashcroft FM, Rorsman P. 2011.  
536 Chronic Palmitate Exposure Inhibits Insulin Secretion by Dissociation of Ca<sup>2+</sup> Channels from Secretory  
537 Granules. *Cell metabolism* **13**:487. doi: 10.1016/j.cmet.2011.03.002, PMID: 28903031
- 538 Hunyady L, Catt KJ. 2006. Pleiotropic AT1 receptor signaling pathways mediating physiological and pathogenic  
539 actions of angiotensin II. *Molecular endocrinology* **20**:953-970. doi: 10.1210/me.2004-0536, PMID:  
540 16141358
- 541 Jacobson DA, Kuznetsov A, Lopez JP, Kash S, Ammälä CE, Philipson LH. 2007. Kv2.1 ablation alters glucose-  
542 induced islet electrical activity, enhancing insulin secretion. *Cell metabolism* **6**:229-235. doi:  
543 10.1016/j.cmet.2007.07.010, PMID: 17767909
- 544 Jacobson DA, Philipson LH. 2007. Action potentials and insulin secretion: new insights into the role of Kv channels.  
545 *Diabetes, obesity & metabolism* **9 Suppl 2**:89-98. doi: 10.1111/j.1463-1326.2007.00784.x, PMID: 17919183
- 546 Kahn SE, Haffner SM, Heise MA, Herman WH, Holman RR, Jones NP, Kravitz BG, Lachin JM, O'Neill MC,  
547 Zinman B, Viberti G, ADOPT Study Group. 2006. Glycemic durability of rosiglitazone, metformin, or  
548 glyburide monotherapy. *The New England journal of medicine* **355**:2427-2443. doi:  
549 10.1056/NEJMoa066224, PMID: 17145742
- 550 Kalwat MA, Cobb MH. 2017. Mechanisms of the amplifying pathway of insulin secretion in the  $\beta$  cell.  
551 *Pharmacology & therapeutics* **179**:17-30. doi: 10.1016/j.pharmthera.2017.05.003, PMID: 28527919
- 552 Kim SJ, Widenmaier SB, Choi WS, Nian C, Ao Z, Warnock G, McIntosh CH. 2012. Pancreatic  $\beta$ -cell prosurvival  
553 effects of the incretin hormones involve post-translational modification of Kv2.1 delayed rectifier channels.  
554 *Cell death and differentiation* **19**:333-344. doi: 10.1038/cdd.2011.102, PMID: 21818121
- 555 Kjeldsen SE, Julius S, Mancia G, McInnes GT, Hua T, Weber MA, Coca A, Ekman S, Girerd X, Jamerson K,  
556 Larochelle P, MacDonald TM, Schmieder RE, Schork MA, Stolt P, Viskoper R, Widimský J, Zanchetti A,  
557 VALUE Trial Investigators. 2006. Effects of valsartan compared to amlodipine on preventing type 2 diabetes  
558 in high-risk hypertensive patients: the VALUE trial. *Journal of hypertension* **24**:1405-1412. doi:  
559 10.1097/01.hjh.0000234122.55895.5b, PMID: 16794491
- 560 Lee CH, Chu CS, Tsai HJ, Ke LY, Lee HC, Yeh JL, Chen CH, Wu BN. 2018. Xanthine-derived KMUP-1 reverses  
561 glucotoxicity-activated Kv channels through the cAMP/PKA signaling pathway in rat pancreatic  $\beta$  cells.  
562 *Chemico-biological interactions* **279**:171-176. doi: 10.1016/j.cbi.2017.11.017, PMID: 29183753
- 563 Levy J, Atkinson AB, Bell PM, McCance DR, Hadden DR. 1998. Beta-cell deterioration determines the onset and



- 564 rate of progression of secondary dietary failure in type 2 diabetes mellitus: the 10-year follow-up of the  
565 Belfast Diet Study. *Diabetic medicine : a journal of the British Diabetic Association* **15**:290-296. doi:  
566 10.1002/(SICI)1096-9136(199804)15:4<290::AID-DIA570>3.0.CO;2-M, PMID: 9585393
- 567 Li X, Yuan L, Li J, Li H, Cheng S. 2012. Blockade of renin angiotensin system increased resistance to STZ-induced  
568 diabetes in rats with long-term high-fat diet. *Experimental diabetes research* **2012**:618923. doi:  
569 10.1155/2012/618923, PMID: 23197974
- 570 Li XN, Herrington J, Petrov A, Ge L, Eiermann G, Xiong Y, Jensen MV, Hohmeier HE, Newgard CB, Garcia ML,  
571 Wagner M, Zhang BB, Thornberry NA, Howard AD, Kaczorowski GJ, Zhou YP. 2013. The role of voltage-  
572 gated potassium channels Kv2.1 and Kv2.2 in the regulation of insulin and somatostatin release from  
573 pancreatic islets. *The Journal of pharmacology and experimental therapeutics* **344**:407-416. doi:  
574 10.1124/jpet.112.199083, PMID: 23161216
- 575 Liu F, Zhang Y, Liang Z, Sun Q, Liu H, Zhao J, Xu J, Zheng J, Yun Y, Yu X, Song W, Sun X. 2018. Cleavage of  
576 potassium channel Kv2.1 by BACE2 reduces neuronal apoptosis. *Molecular psychiatry* **23**:1542-1554. doi:  
577 10.1038/s41380-018-0060-2, PMID: 29703946
- 578 MacDonald PE, Wheeler MB. 2003. Voltage-dependent K(+) channels in pancreatic beta cells: role, regulation and  
579 potential as therapeutic targets. *Diabetologia* **46**:1046-1062. doi: 10.1007/s00125-003-1159-8, PMID:  
580 12830383
- 581 MacDonald P E, Ha X F, Wang J, Smukler S R, Sun A M, Gaisano H Y, Salapatek A M, Backx P H, Wheeler M B.  
582 2001. Members of the Kv1 and Kv2 voltage-dependent K(+) channel families regulate insulin secretion.  
583 *Molecular endocrinology* **15**.
- 584 Makino H, Haneda M, Babazono T, Moriya T, Ito S, Iwamoto Y, Kawamori R, Takeuchi M, Katayama S,  
585 INNOVATION Study Group. 2008. Microalbuminuria reduction with telmisartan in normotensive and  
586 hypertensive Japanese patients with type 2 diabetes: a post-hoc analysis of The Incipient to Overt:  
587 Angiotensin II Blocker, Telmisartan, Investigation on Type 2 Diabetic Nephropathy (INNOVATION) study.  
588 *Hypertension research : official journal of the Japanese Society of Hypertension* **31**:657-664. doi:  
589 10.1291/hyres.31.657, PMID: 18633177
- 590 Michel MC, Foster C, Brunner HR, Liu L. 2013. A systematic comparison of the properties of clinically used  
591 angiotensin II type 1 receptor antagonists. *Pharmacological reviews* **65**:809-848. doi: 10.1124/pr.112.007278,  
592 PMID: 23487168
- 593 Nagel JM, Tietz AB, Göke B, Parhofer KG. 2006. The effect of telmisartan on glucose and lipid metabolism in  
594 nondiabetic, insulin-resistant subjects. *Metabolism: clinical and experimental* **55**:1149-1154. doi:  
595 10.1016/j.metabol.2006.04.011, PMID: 16919531
- 596 Nair AB, Jacob S. 2016. A simple practice guide for dose conversion between animals and human. *Journal of basic  
597 and clinical pharmacy* **7**:27-31. doi: 10.4103/0976-0105.177703, PMID: 27057123
- 598 Olofsson CS, Collins S, Bengtsson M, Eliasson L, Salehi A, Shimomura K, Tarasov A, Holm C, Ashcroft F, Rorsman  
599 P. 2007. Long-term exposure to glucose and lipids inhibits glucose-induced insulin secretion downstream of  
600 granule fusion with plasma membrane. *Diabetes* **56**:1888-1897. doi: 10.2337/db06-1150, PMID: 17456851
- 601 Parving HH, Lehnert H, Bröchner-Mortensen J, Gomis R, Andersen S, Arner P, Irbesartan in Patients with Type 2  
602 Diabetes and Microalbuminuria Study Group. 2001. The effect of irbesartan on the development of diabetic  
603 nephropathy in patients with type 2 diabetes. *The New England journal of medicine* **345**:870-878. doi:  
604 10.1056/NEJMoa011489, PMID: 11565519
- 605 Perl S, Schmölzer I, Sourij H, Pressl H, Eder M, Zweiker R, Wascher TC. 2010. Telmisartan improves vascular  
606 function independently of metabolic and antihypertensive effects in hypertensive subjects with impaired  
607 glucose tolerance. *International journal of cardiology* **139**:289-296. doi: 10.1016/j.ijcard.2008.10.048,

- 608 PMID: 19118910
- 609 Roe MW, Worley JF 3rd, Mittal AA, Kuznetsov A, DasGupta S, Mertz RJ, Witherspoon SM 3rd, Blair N, Lancaster  
610 ME, McIntyre MS, Shehee WR, Dukes ID, Philipson LH. 1996. Expression and function of pancreatic beta-  
611 cell delayed rectifier K<sup>+</sup> channels. Role in stimulus-secretion coupling. *The Journal of biological chemistry*  
612 **271**:32241-32246. doi: 10.1074/jbc.271.50.32241, PMID: 8943282
- 613 Rustenbeck I, Baltrusch S, Tiedge M. 2010. Do insulinotropic glucose-lowering drugs do more harm than good? The  
614 hypersecretion hypothesis revisited. *Diabetologia* **53**:2105-2111. doi: 10.1007/s00125-010-1839-0, PMID:  
615 20593160
- 616 Sabatini PV, Speckmann T, Lynn FC. 2019. Friend and foe:  $\beta$ -cell Ca<sup>2+</sup> signaling and the development of diabetes.  
617 *Molecular metabolism* **21**:1-12. doi: 10.1016/j.molmet.2018.12.007, PMID: 30630689
- 618 Saitoh Y, Hongwei W, Ueno H, Mizuta M, Nakazato M. 2009. Telmisartan attenuates fatty-acid-induced oxidative  
619 stress and NAD(P)H oxidase activity in pancreatic beta-cells. *Diabetes & metabolism* **35**:392-397. doi:  
620 10.1016/j.diabet.2009.04.005, PMID: 19713141
- 621 Schupp M, Clemenz M, Gineste R, Witt H, Janke J, Helleboed S, Hennuyer N, Ruiz P, Unger T, Staels B, Kintscher  
622 U. 2005. Molecular characterization of new selective peroxisome proliferator-activated receptor gamma  
623 modulators with angiotensin receptor blocking activity. *Diabetes* **54**:3442-3452. doi:  
624 10.2337/diabetes.54.12.3442, PMID: 16306360
- 625 Schupp M, Janke J, Clasen R, Unger T, Kintscher U. 2004. Angiotensin type 1 receptor blockers induce peroxisome  
626 proliferator-activated receptor-gamma activity. *Circulation* **109**:2054-2057. doi:  
627 10.1161/01.CIR.0000127955.36250.65, PMID: 15117841
- 628 Shiuchi T, Iwai M, Li HS, Wu L, Min LJ, Li JM, Okumura M, Cui TX, Horiuchi M. 2004. Angiotensin II type-1  
629 receptor blocker valsartan enhances insulin sensitivity in skeletal muscles of diabetic mice. *Hypertension*  
630 **43**:1003-1010. doi: 10.1161/01.HYP.0000125142.41703.64, PMID: 15037562
- 631 Tan C, Voss U, Svensson S, Erlinge D, Olde B. 2013. High glucose and free fatty acids induce beta cell apoptosis  
632 via autocrine effects of ADP acting on the P2Y<sub>13</sub> receptor. *Purinergic signalling* **9**.
- 633 Tingting Z, Du Mengfan, Tong Z, Lingling Q, Zhiyuan Z, Jing C. 2018. ETA as a novel Kv2.1 inhibitor ameliorates  
634  $\beta$ -cell dysfunction and hyperglycaemia. *Clinical and experimental pharmacology & physiology* **45**.
- 635 Turner N, Zeng XY, Osborne B, Rogers S, Ye JM. 2016. Repurposing Drugs to Target the Diabetes Epidemic. *Trends*  
636 *in pharmacological sciences* **37**:379-389. doi: 10.1016/j.tips.2016.01.007, PMID: 26900045
- 637 van der Zijl NJ, Moors CC, Goossens GH, Hermans MM, Blaak EE, Diamant M. 2011. Valsartan improves {beta}-  
638 cell function and insulin sensitivity in subjects with impaired glucose metabolism: a randomized controlled  
639 trial. *Diabetes care* **34**:845-851. doi: 10.2337/dc10-2224, PMID: 21330640
- 640 Viberti G, Wheeldon NM, MicroAlbuminuria Reduction With VALsartan (MARVAL) Study Investigators. 2002.  
641 Microalbuminuria reduction with valsartan in patients with type 2 diabetes mellitus: a blood pressure-  
642 independent effect. *Circulation* **106**:672-678. doi: 10.1161/01.cir.0000024416.33113.0a, PMID: 12163426
- 643 Wang Y, Xue J, Li Y, Zhou X, Qiao S, Han D. 2019. Telmisartan protects against high glucose/high lipid-induced  
644 apoptosis and insulin secretion by reducing the oxidative and ER stress. *Cell biochemistry and function*  
645 **37**:161-168. doi: 10.1002/cbf.3383, PMID: 30907023
- 646 Weyer C, Bogardus C, Mott DM, Pratley RE. 1999. The natural history of insulin secretory dysfunction and insulin  
647 resistance in the pathogenesis of type 2 diabetes mellitus. *The Journal of clinical investigation* **104**:787-794.  
648 doi: 10.1172/JCI7231, PMID: 10491414
- 649 Yamana A, Arita M, Furuta M, Shimajiri Y, Sanke T. 2008. The angiotensin II receptor blocker telmisartan improves  
650 insulin resistance and has beneficial effects in hypertensive patients with type 2 diabetes and poor glycemic  
651 control. *Diabetes research and clinical practice* **82**:127-131. doi: 10.1016/j.diabres.2008.07.003, PMID:

652 18692932  
653 Yao H, Zhou K, Yan D, Li M, Wang Y. 2009. The Kv2.1 channels mediate neuronal apoptosis induced by  
654 excitotoxicity. *Journal of neurochemistry* **108**:909-919. doi: 10.1111/j.1471-4159.2008.05834.x, PMID:  
655 19077057  
656 Yu SP, Kerchner GA. 1998. Endogenous voltage-gated potassium channels in human embryonic kidney (HEK293)  
657 cells. *Journal of neuroscience research* **52**:612-617. doi: 10.1002/(SICI)1097-  
658 4547(19980601)52:5<612::AID-JNR13>3.0.CO;2-3, PMID: 9632317  
659 Yusuf S, Ostergren JB, Gerstein HC, Pfeffer MA, Swedberg K, Granger CB, Olofsson B, Probstfield J, McMurray  
660 JV, Candesartan in Heart Failure-Assessment of Reduction in Mortality and Morbidity Program Investigators.  
661 2005. Effects of candesartan on the development of a new diagnosis of diabetes mellitus in patients with  
662 heart failure. *Circulation* **112**:48-53. doi: 10.1161/CIRCULATIONAHA.104.528166, PMID: 15983242  
663 Zhou TT, Quan LL, Chen LP, Du T, Sun KX, Zhang JC, Yu L, Li Y, Wan P, Chen LL, Jiang BH, Hu LH, Chen J,  
664 Shen X. 2016. SP6616 as a new Kv2.1 channel inhibitor efficiently promotes  $\beta$ -cell survival involving both  
665 PKC/Erk1/2 and CaM/PI3K/Akt signaling pathways. *Cell death & disease* **7**:e2216. doi:  
666 10.1038/cddis.2016.119, PMID: 27148689  
667

668

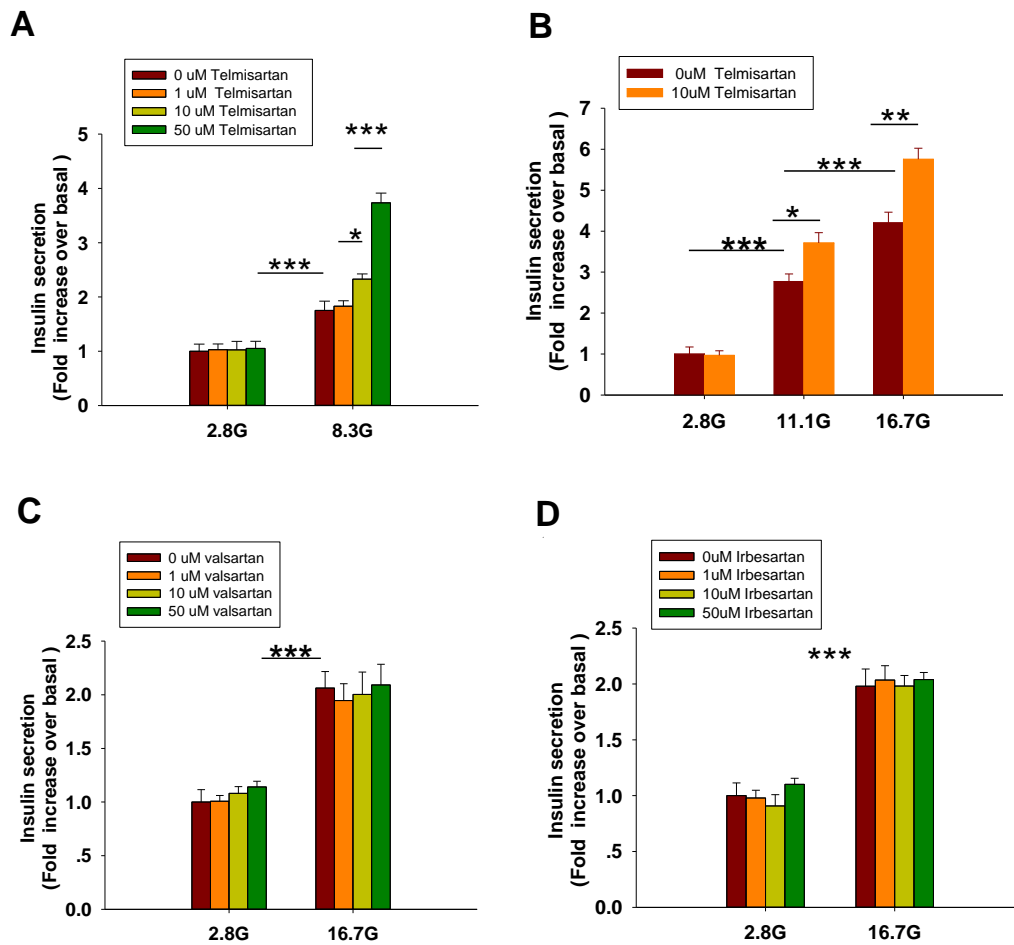

669

670 **Fig. 1:** Only telmisartan among the three ARBs potentiated insulin secretion in rat islets.

671 In every tube, five handpicked rat islets were incubated for 30 min in 500  $\mu$ L Krebs

672 Ringer bicarbonate-HEPES (KRBH) buffer containing different drugs and glucose

673 concentrations, then supernatant liquid was collected for insulin measurement ( $n = 7$

674 tubes per group). (A) Rat islets were treated with various doses (1, 10, and 50  $\mu$ M) of

675 telmisartan under 2.8 and 8.3 mM glucose (denoted as 2.8 G and 8.3 G) conditions. (B)

676 Islets were treated with 10  $\mu$ M telmisartan under different glucose concentrations (2.8,

677 11.1, and 16.7 mM). (C and D) Rat islets were treated with various doses (1, 10, and 50

678  $\mu$ M) of valsartan or irbesartan under 2.8 and 16.7 mM glucose conditions. All results

679 are normalized to basal secretion at 2.8 G, and reported as the means  $\pm$  SEM. Statistical

680 differences among three or more groups were compared using one-way analysis of  
681 variance (ANOVA) and Student–Newman–Keuls method post hoc analysis. Statistical  
682 differences between two groups (with or without telmisartan) under the same glucose  
683 condition in (B) were determined using an unpaired two-tailed Student’s *t* test. \*  $P <$   
684  $0.05$ , \*\*  $P < 0.01$ , \*\*\*  $P < 0.001$ .  
685

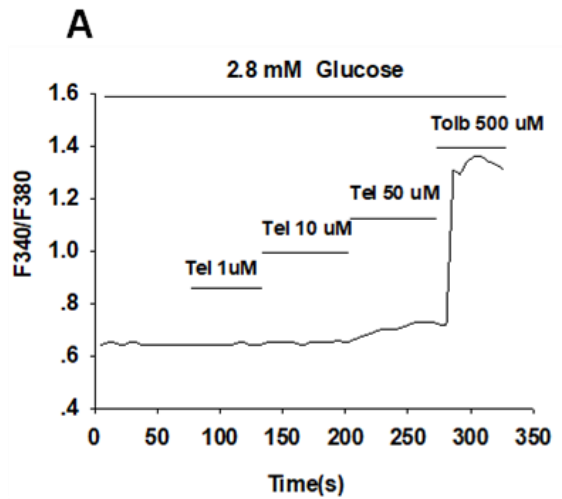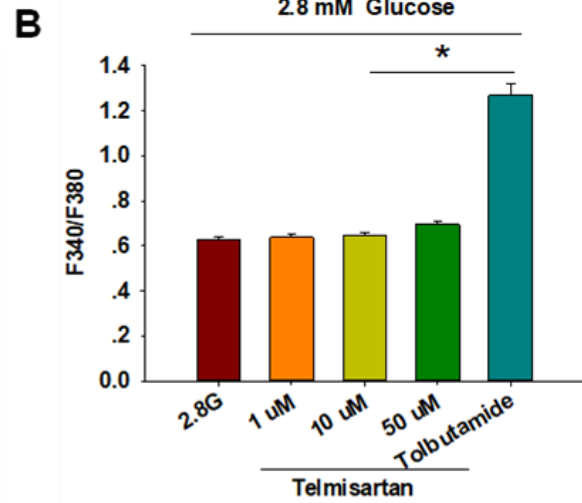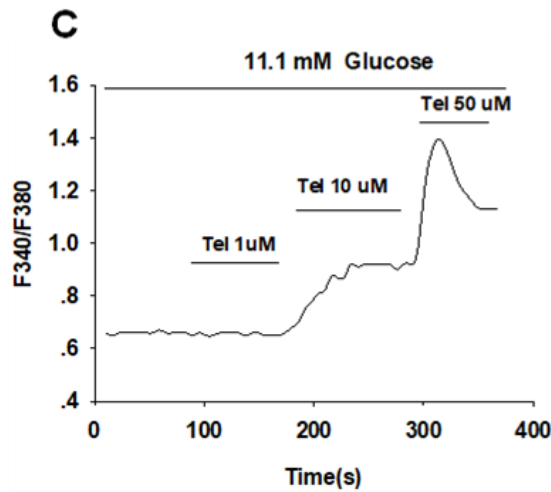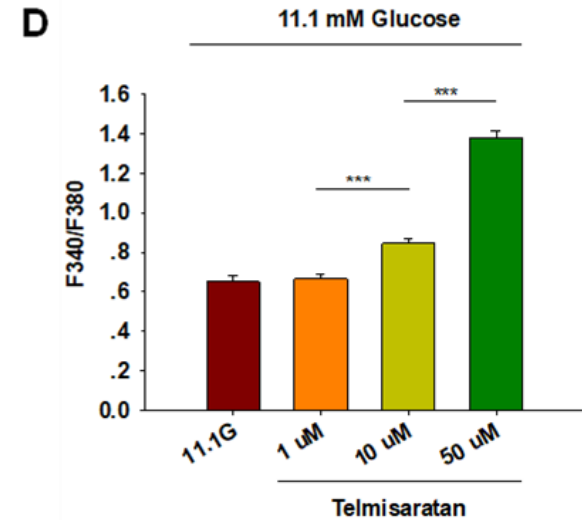

686

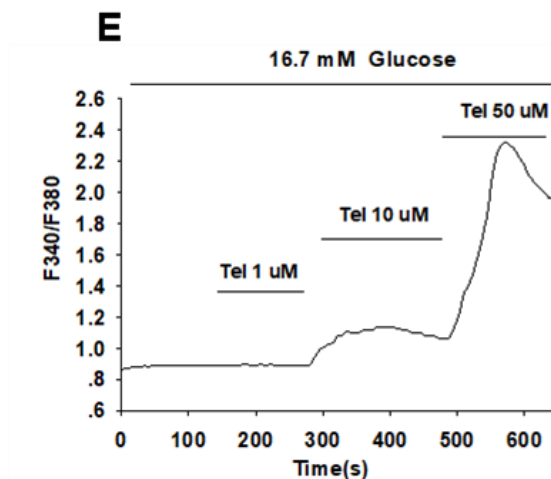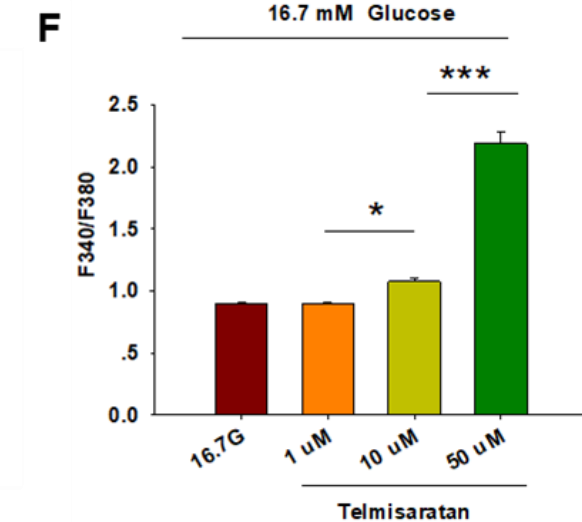

687

688

689

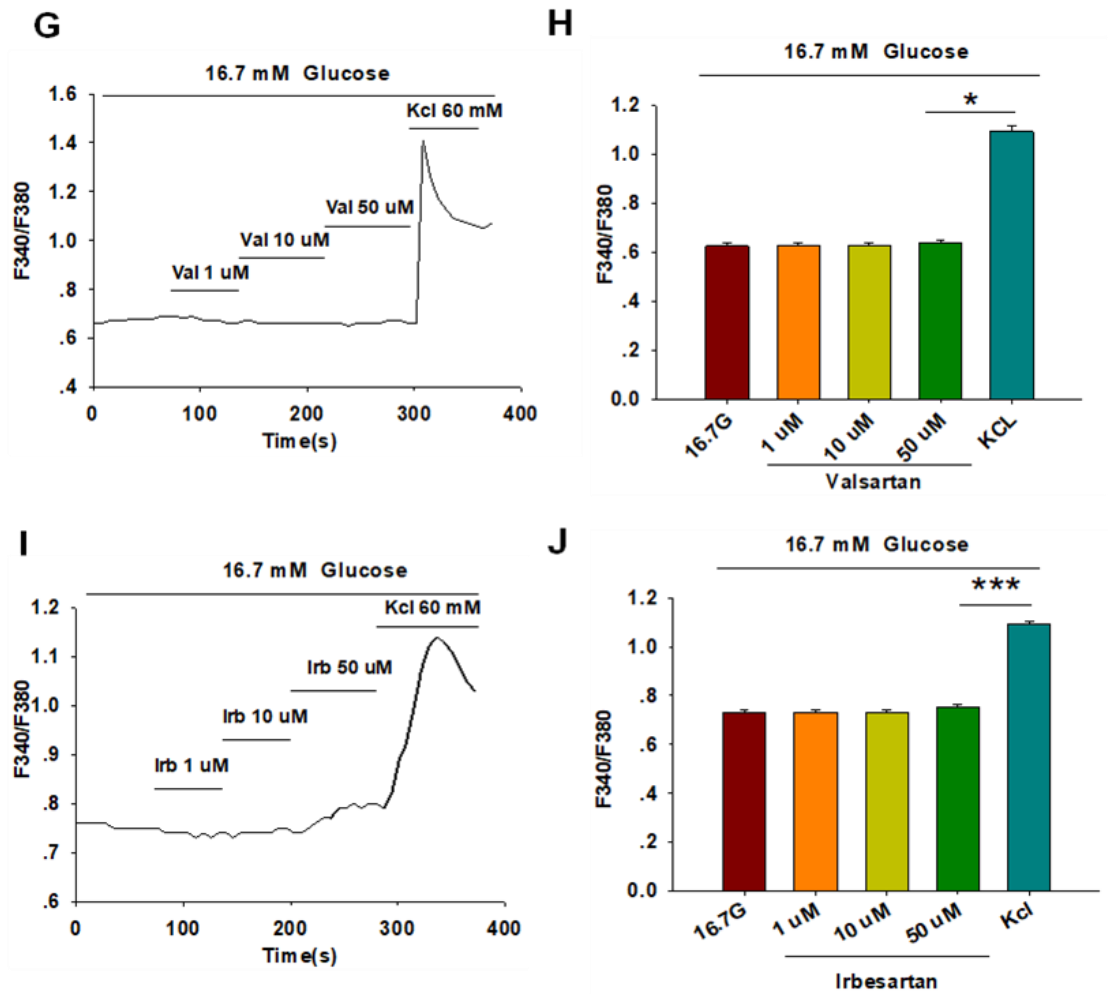

690

691 **Fig. 2:** Only telmisartan among the three ARBs increased intracellular  $[Ca^{2+}]_i$  ( $[Ca^{2+}]_i$ )

692 concentration in rat pancreatic  $\beta$ -cells. (A) The trace shows the changes of  $[Ca^{2+}]_i$

693 concentration in  $\beta$ -cells treated with 1, 10, and 50  $\mu$ M telmisartan (Tel) under 2.8 mM

694 glucose conditions; 500  $\mu$ M tolbutamide (Tolb) was used as a positive control. (B) The

695 average value during 30 s F340/F380 spikes for each test in response to different doses

696 of telmisartan under 2.8 mM glucose conditions as indicated ( $n = 9$ ). (C and D) The

697 trace shows the changes of  $[Ca^{2+}]_i$  concentration in  $\beta$ -cells treated with different doses

698 of telmisartan under 11.1 mM glucose conditions, and the average value during 30s

699 F340/F380 spikes for each test as indicated ( $n = 9$ ). (E and F) The trace shows the

700 changes of  $[Ca^{2+}]_i$  concentration in  $\beta$ -cells treated with different doses of telmisartan

701 under 16.7 mM glucose conditions, and the average value during 30s F340/F380 spikes  
702 for each test as indicated (n = 9). (G, H and I, J) The trace shows the changes of  $[Ca^{2+}]_i$   
703 concentration in  $\beta$ -cells treated with 1, 10, and 50  $\mu$ M of valsartan (Val) or irbesartan  
704 (Irb) under 16.7 mM glucose conditions respectively, and the average value during 30s  
705 F340/F380 spikes for each test as indicated. KCl (60 mM) was used as a positive control  
706 (n = 9). All results are reported as the means  $\pm$  SEM. Statistical differences among three  
707 or more groups were compared using one-way ANOVA, and followed by Student–  
708 Newman–Keuls Method post hoc analysis in (D), (F), and (J), or Tukey post hoc  
709 analysis in (B) and (H). \* P < 0.05, \*\*\* P < 0.001  
710



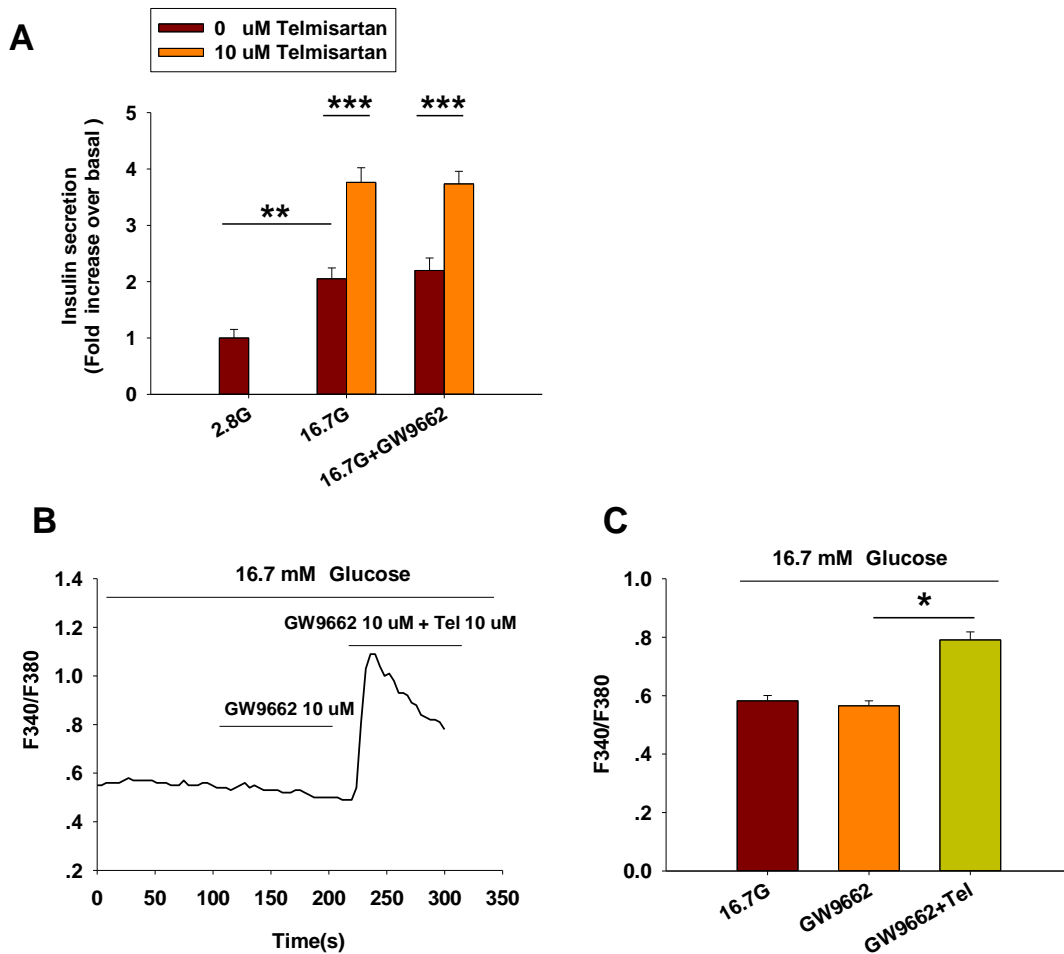

711

712 **Fig. 3:** PPAR $\gamma$  does not participate in the pathway of telmisartan-induced insulin

713 secretion and elevation of [Ca $^{2+}$ ] $_i$  levels (A) Telmisartan (10  $\mu$ M) potentiated glucose-

714 stimulated insulin secretion in the presence or absence of the PPAR $\gamma$  inhibitor

715 GW9662 (10  $\mu$ M) (n = 7). All insulin secretion results are normalized to basal secretion

716 at 2.8 Mm glucose concentration. (B) The trace shows the changes of [Ca $^{2+}$ ] $_i$

717 concentration in  $\beta$ -cells treated with GW9662 (10  $\mu$ M) alone or in combination with

718 telmisartan (Tel 10  $\mu$ M) under 16.7 mM glucose conditions. (C) The average value

719 during 30s F340/F380 spikes for each test in response to GW9662 alone or in

720 combination with telmisartan under 16.7 mM glucose conditions as indicated (n = 9).

721 All results are reported as the means  $\pm$  SEM. In (A), statistical differences between two

722 groups (with or without telmisartan) were compared using an unpaired two-tailed  
723 Student's *t* test, and difference among three groups without telmisartan were compared  
724 using one-way ANOVA and Student-Newman-Keuls method post hoc analysis. In (C),  
725 difference among three groups was determined by one-way ANOVA and Tukey Test  
726 post hoc analysis. \**P* < 0.05, \*\**P* < 0.01, \*\*\**P* < 0.001.  
727

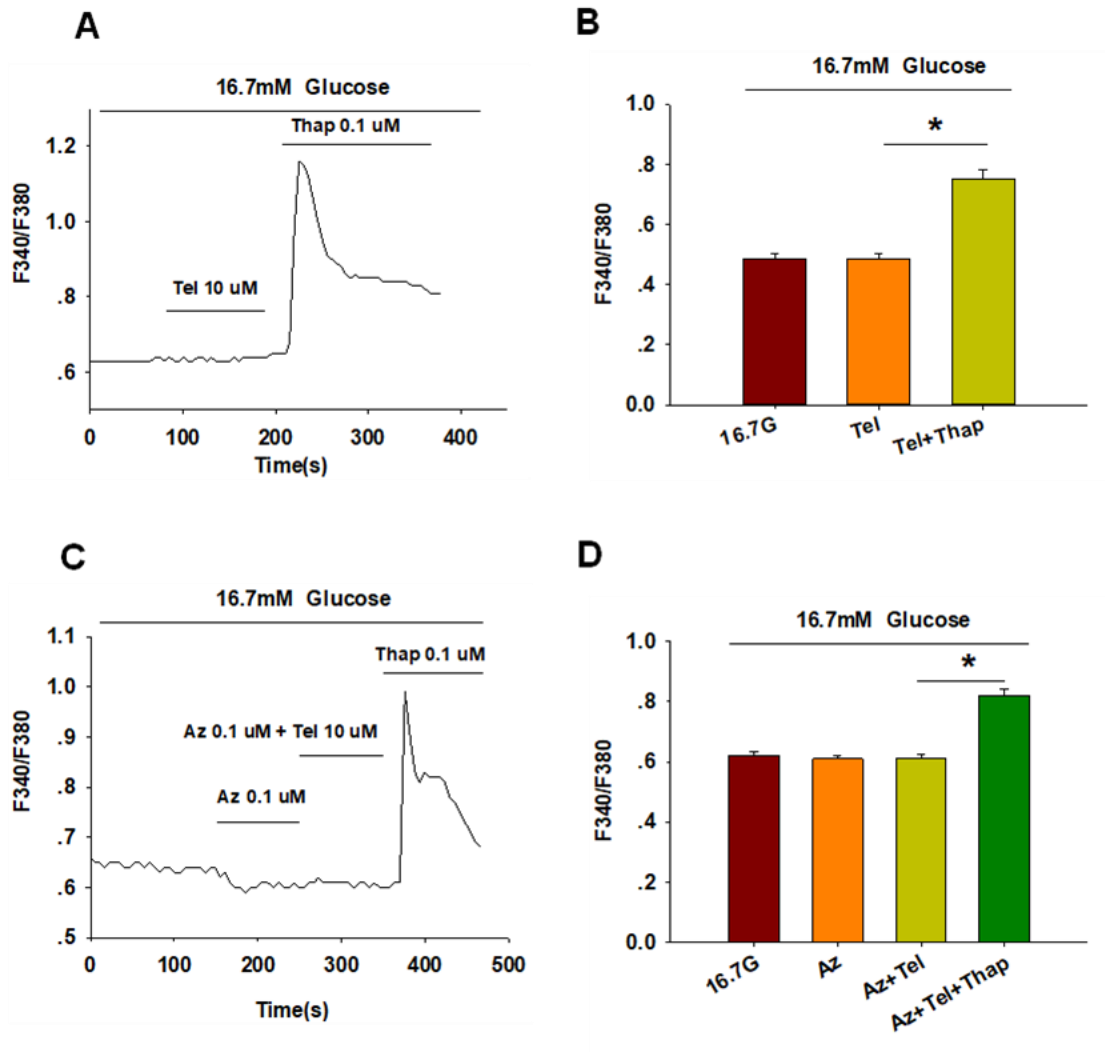

728

729 **Fig. 4:** Telmisartan enhances [Ca<sup>2+</sup>]<sub>i</sub> levels through extracellular Ca<sup>2+</sup> influx, rather than  
730 intracellular Ca<sup>2+</sup> stores release. (A) The trace shows the changes of [Ca<sup>2+</sup>]<sub>i</sub>  
731 concentration in β-cells treated with telmisartan (Tel, 10 μM) under 16.7 mM glucose  
732 conditions in Ca<sup>2+</sup>-free KRBH medium. (B) The average value of F340/F380 during  
733 each test in response to telmisartan (Tel, 10 μM) in Ca<sup>2+</sup>-free KRB medium (n = 23).  
734 (C) The trace shows the changes of [Ca<sup>2+</sup>]<sub>i</sub> concentration in β-cells treated with  
735 telmisartan (Tel 10 μM) under 16.7 mM glucose conditions with addition of the L-type  
736 VGCC blocker azelnidipine (Az, 0.1 μM). (D) The mean value of F340/F380 during  
737 each test in response to telmisartan (10 μM) with added azelnidipine (0.1 μM).

738 Thapsigargin (Thap, 0.1  $\mu$ M) was used as a positive control (n = 12). All results are  
739 reported as the means  $\pm$  SEM. Statistical differences among three or more groups were  
740 determined by one-way ANOVA, followed by Tukey Test post hoc analysis. \* P < 0.05.  
741

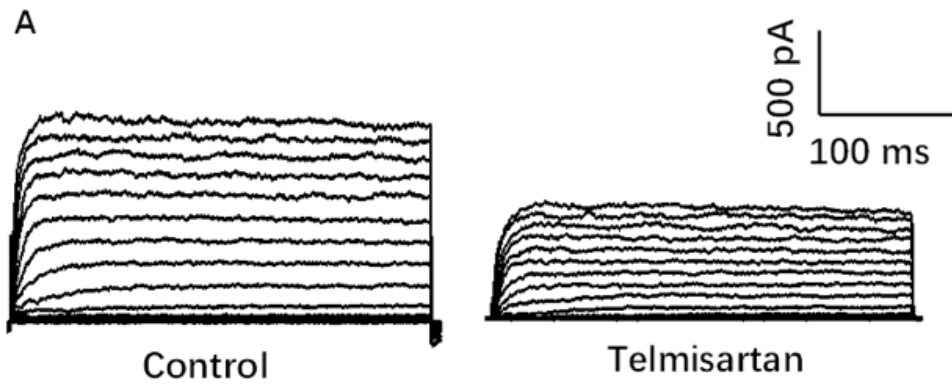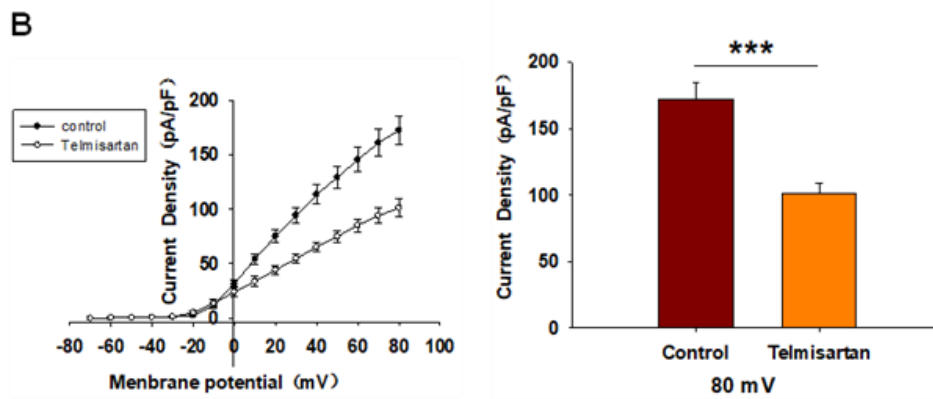

742

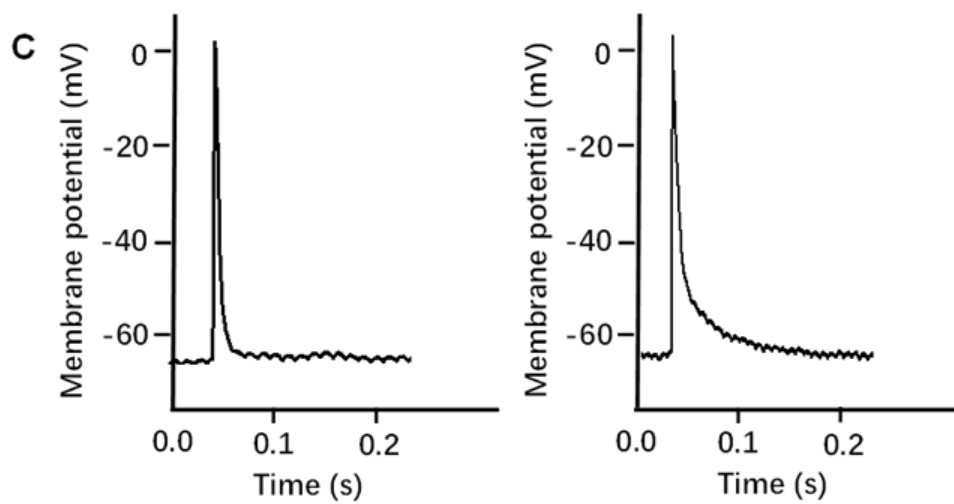

743

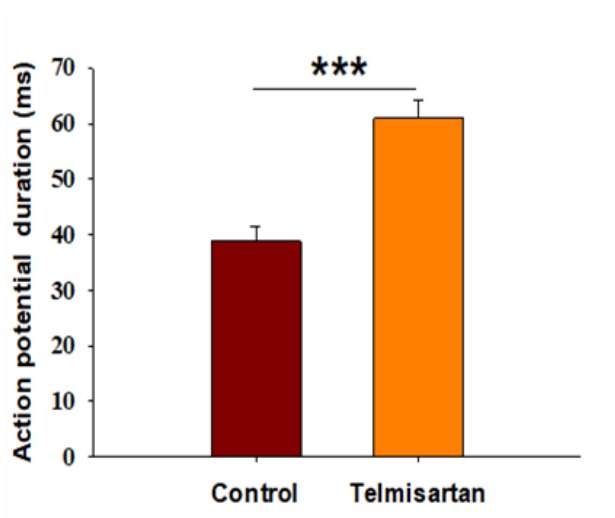

744

745 **Fig. 5:** Pancreatic  $\beta$ -cells treated with telmisartan exhibit reduced Kv currents and  
746 extended APD. (A) Kv currents were recorded in voltage-clamp mode with holding  
747 potential from  $-70$  to  $+80$  mV in 10 mV increments. Representative current traces  
748 recorded in control and treated with telmisartan-treated ( $10 \mu\text{M}$ )  $\beta$ -cells. (B) Current-  
749 voltage relationship curves of Kv channels and summary of the mean current density  
750 of Kv channels recorded at 80 mV depolarization (control  $n = 9$ , telmisartan  $n = 7$ ). (C)  
751 Action potentials were elicited by 4 ms, 150 pA current. Representative action potential  
752 waveforms for  $\beta$ -cells treated without or with telmisartan ( $10 \mu\text{M}$ ) and summary of the  
753 mean APDs ( $n = 7$ ). Statistical differences between two groups were determined using  
754 an unpaired two-tailed Student's  $t$  test. \*\*\*  $P < 0.001$ .

755

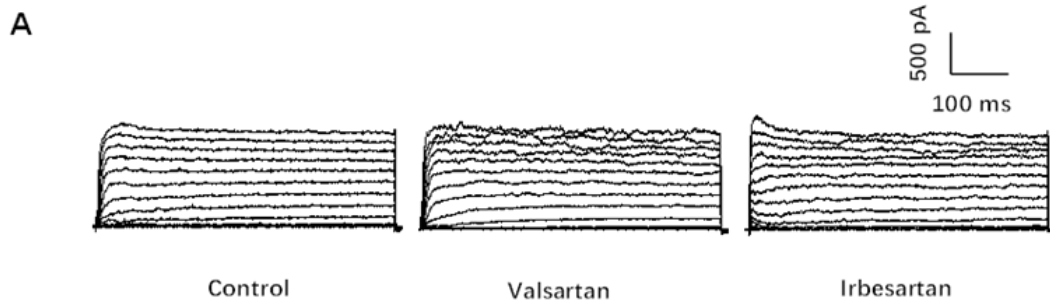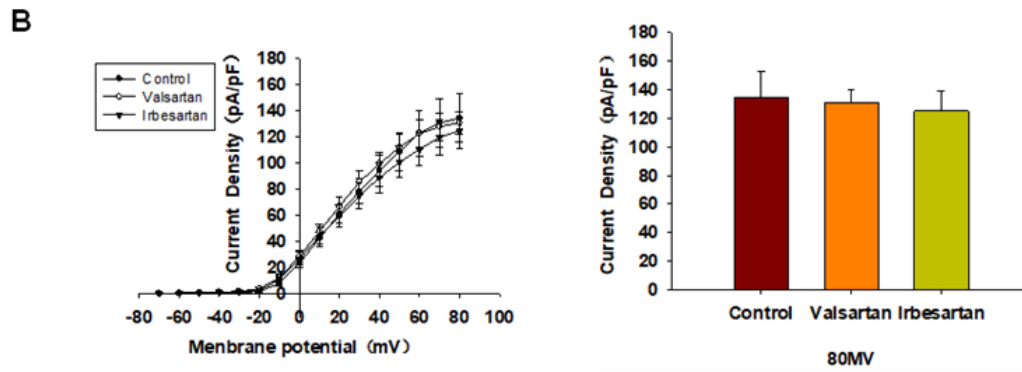

756

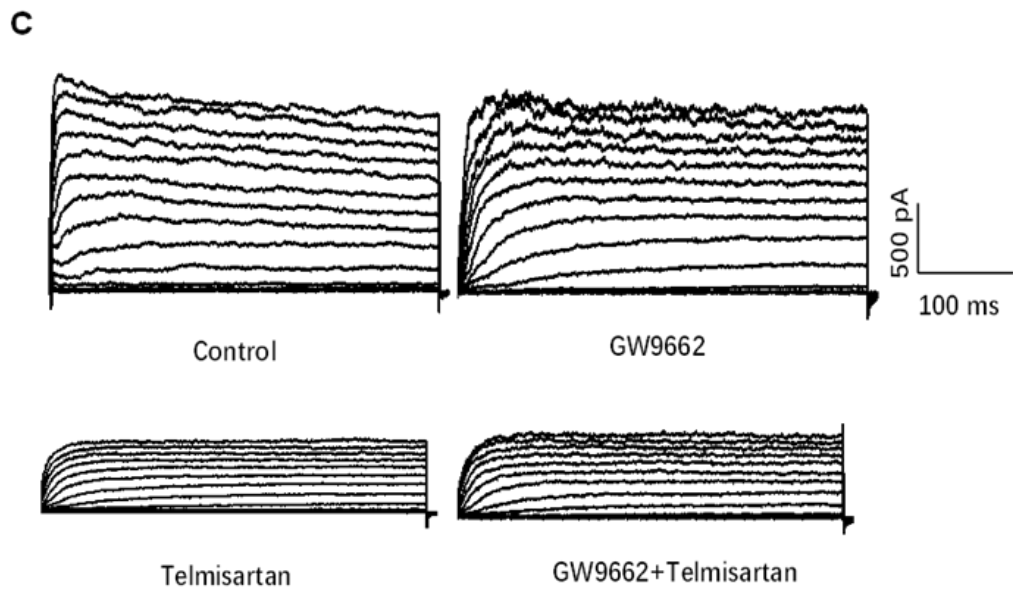

757

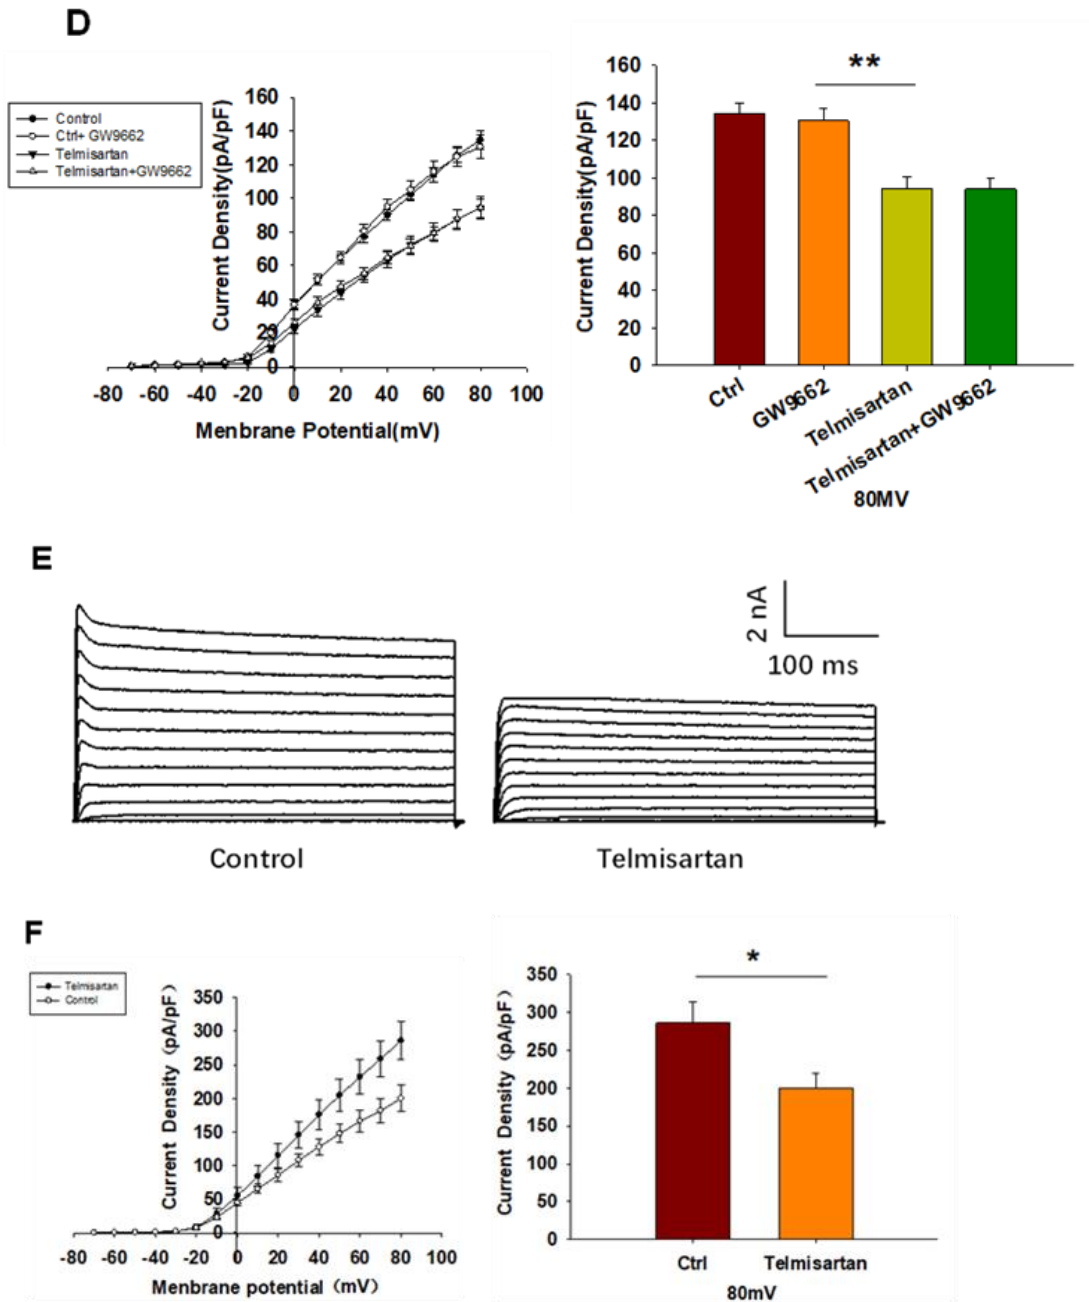

758

759

760 **Fig. 6:** The AT-1 receptor and PPAR $\gamma$  are not involved in the telmisartan-induced  
761 inhibition of Kv channels, whereas telmisartan exerts a direct effect on Kv2.1 channels.  
762 (A) Representative current traces recorded upon treatment with valsartan (10  $\mu$ M) and  
763 irbesartan (10  $\mu$ M) in  $\beta$ -cells. (B) Current-voltage relationship curves and the summary  
764 of the mean current density of Kv channels recorded at 80 mV depolarization (control  
765  $n = 7$ , valsartan  $n = 8$ , irbesartan  $n = 6$ ). (C) Representative current traces recorded  
766 under treatment of telmisartan (10  $\mu$ M) alone or in combination with GW9662 (10  $\mu$ M)  
767 in  $\beta$ -cells. (D) Current-voltage relationship curves and the summary of the mean current



768 density of Kv channels recorded at 80 mV depolarization (control n = 8, GW9662 n =  
769 12, telmisartan n = 7, telmisartan+GW9662 n = 10). (E) The CHO-Kv2.1 cell line was  
770 constructed using a lentivirus vector overexpressing Kv2.1 channels. Representative  
771 current traces recorded without or with telmisartan (10  $\mu$ M) in CHO-Kv2.1 cells. (F)  
772 Current-voltage relationship curves and the summary of the mean current density of Kv  
773 channels recorded at 80 mV depolarization (control n = 10, telmisartan n = 8). All  
774 results are reported as the means  $\pm$  SEM. Statistical differences between two groups  
775 were determined using an unpaired two-tailed Student's *t* test. Statistical differences  
776 among three or more groups were compared using one-way ANOVA. For comparing  
777 the effects of GW9662 groups, Tukey Test post hoc analysis was applied. \* P < 0.05,  
778 \*\* P < 0.01.  
779

A

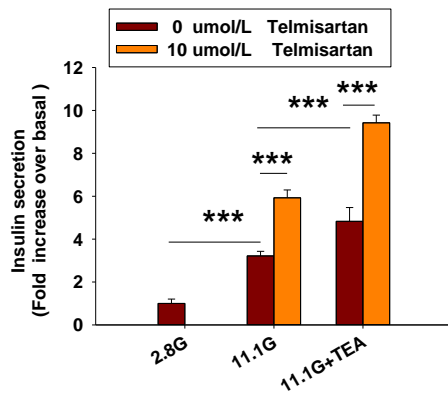

B

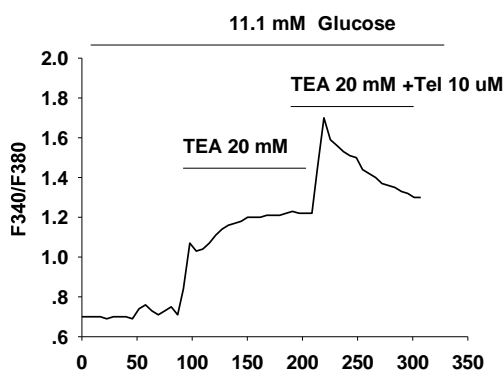

C

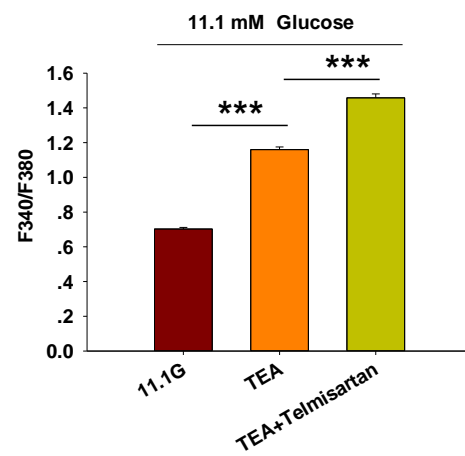

780

D

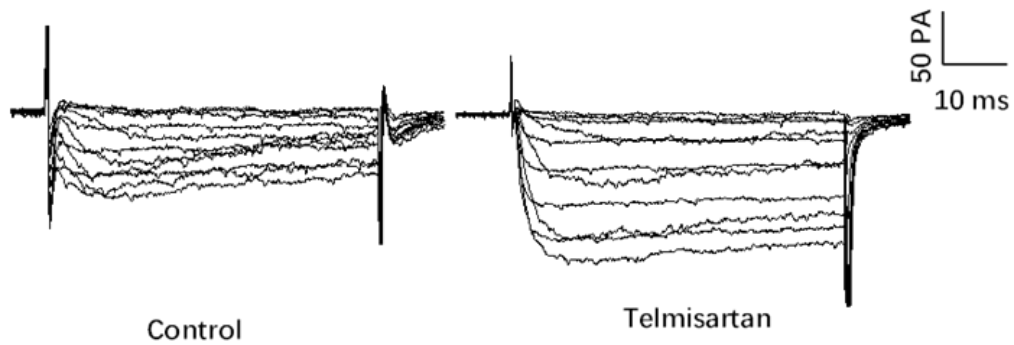

E

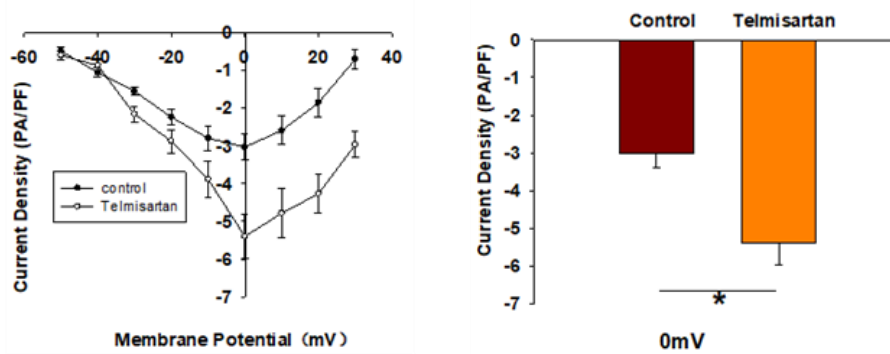

781

782

783 **Fig. 7:** Kv channels partly mediate telmisartan-induced insulin secretion and increase  
784 of  $[Ca^{2+}]_i$  levels. (A) Rat islets were treated with telmisartan (10  $\mu$ M) in the presence  
785 or absence of TEA (20 mM) under 2.8 and 11.1 mM glucose conditions and insulin  
786 secretion was measured (n = 7). All insulin secretion results are normalized to basal  
787 secretion at 2.8 Mm glucose condition. (B) The trace shows the changes of ( $[Ca^{2+}]_i$ )  
788 concentration in  $\beta$ -cells treated with 20 mM TEA and in combination with 10  $\mu$ M  
789 telmisartan (Tel) under 11.1 mM glucose conditions. (C) The average value during  
790 30 s F340/F380 spikes for each test (n = 9). (D) VGCCs were recorded in voltage-clamp  
791 mode with test potentials from -50 to 30 mV in 10 mV increments. Representative  
792 current traces recorded in control and telmisartan-treated (10  $\mu$ M)  $\beta$ -cells. (E) Current-  
793 voltage relationship curves of VGCCs and summary of the mean  $Ca^{2+}$  current density  
794 recorded at 0 mV depolarization (control, n = 7; telmisartan, n = 8). All results are  
795 reported as the means  $\pm$  SEM. Statistical differences between two groups were  
796 determined using an unpaired two-tailed Student's *t* test. Statistical differences among  
797 three groups were compared using one-way ANOVA and Student–Newman–Keuls  
798 method post hoc analysis. Effects on VGCCs between telmisartan and control were  
799 compared using the Mann–Whitney Rank Sum Test. \* P < 0.05, and \*\*\* P < 0.001.  
800

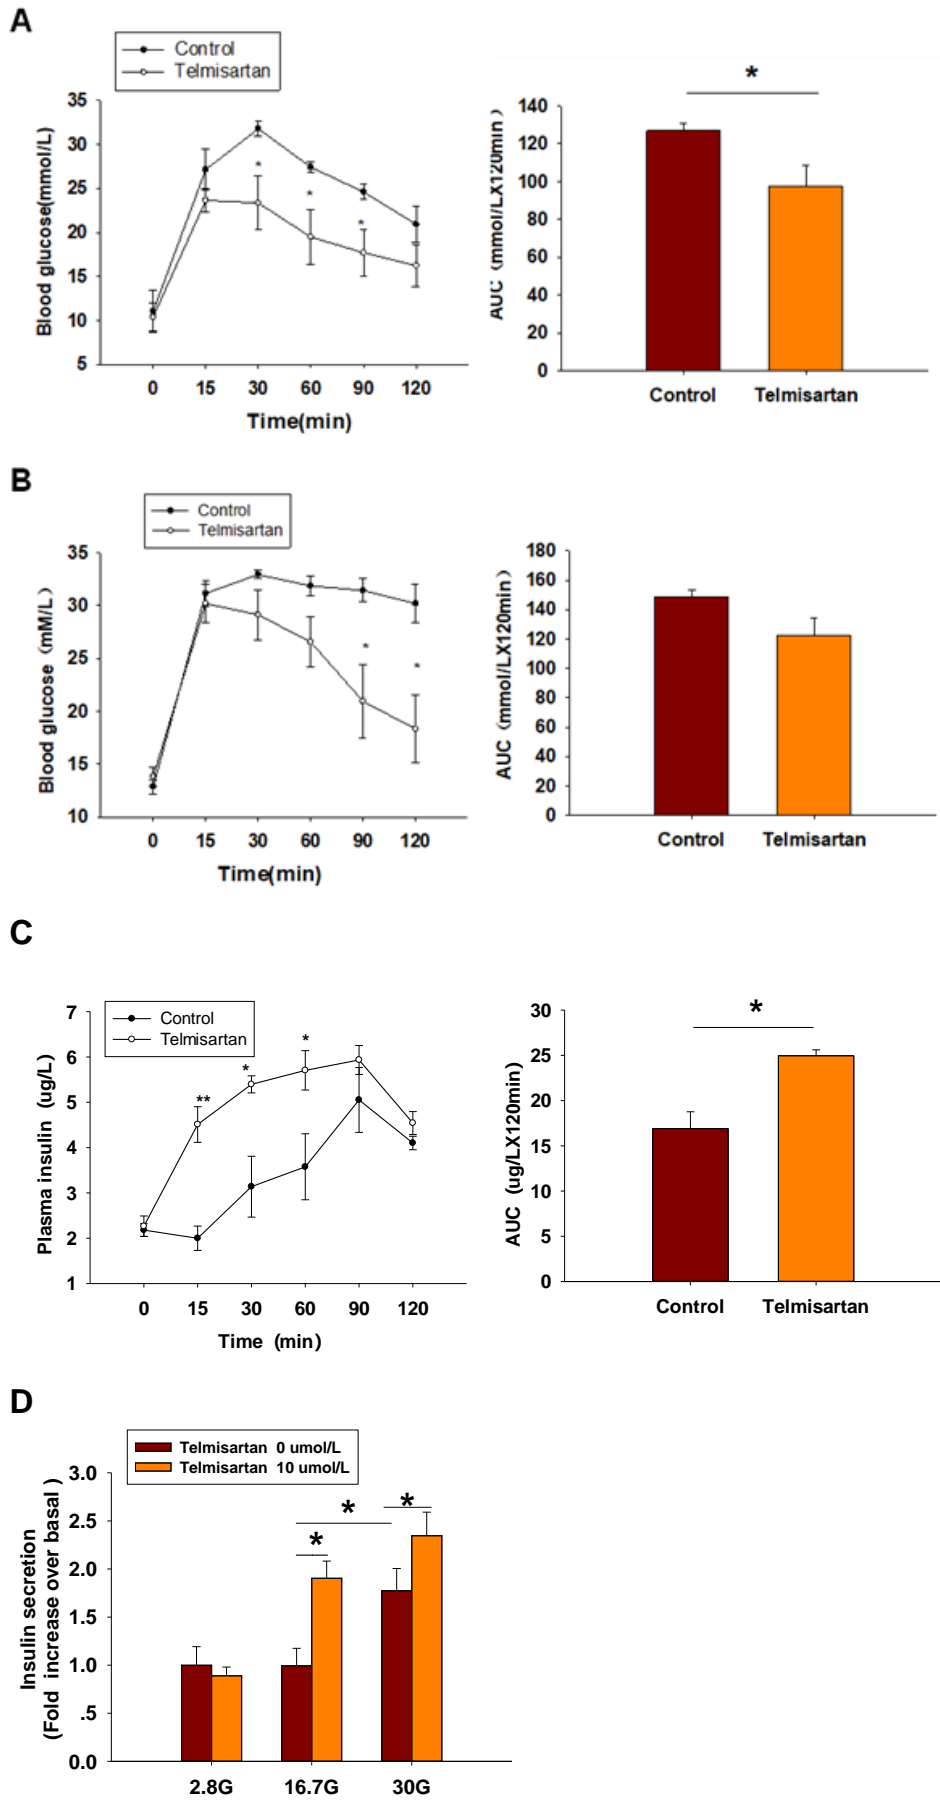

801

802

803 **Fig. 8:** Telmisartan improves glucose tolerance in db/db mice, and elevates GSIS levels  
804 in isolated islets of db/db mice. After 14 h fasting, db/db mice were administered with  
805 telmisartan (15 mg/kg) or vehicle (0.5% carboxymethyl cellulose sodium) (n = 4 mice  
806 per group). After 2 h, mice were fed with glucose (1.5 g/kg), and glucose level and  
807 plasma insulin concentration in tail blood were determined. Finally, islets were isolated  
808 from the db/db mice to perform insulin secretion assays. (A) OGTT was performed and  
809 AUCs for OGTT were calculated from the data in 8-week-old mice. (B) OGTT and  
810 AUC for OGTT in 11-week-old mice. (C) Serum insulin levels at corresponding times  
811 and AUC in 11-week-old mice. (D) Db/db mice islets were treated with or without  
812 telmisartan (10  $\mu$ M) under different glucose concentrations (2.8, 16.7, and 30 mM) (n  
813 = 6). All insulin secretion results are normalized to basal secretion at 2.8 Mm glucose  
814 concentration. All results are reported as the means  $\pm$  SEM. Statistical differences  
815 between two groups were determined using the unpaired two-tailed Student's *t* test  
816 unless otherwise stated. Glucose levels in 11-week-old mice at indicated time points  
817 were compared using the Mann–Whitney Rank Sum Test except at 0 min. AUCs  
818 calculated from the data of glucose levels or plasma insulin levels in 11-week-old mice  
819 were compared using the Mann–Whitney Rank Sum Test. As for the insulin assay in  
820 (D), statistical differences among three groups (without telmisartan) were compared  
821 using one-way ANOVA and followed by Student–Newman–Keuls method post hoc  
822 analysis, and differences between two groups under the same glucose conditions were  
823 compared using the paired *t* test. \*P < 0.05, \*\*P < 0.01.  
824

825

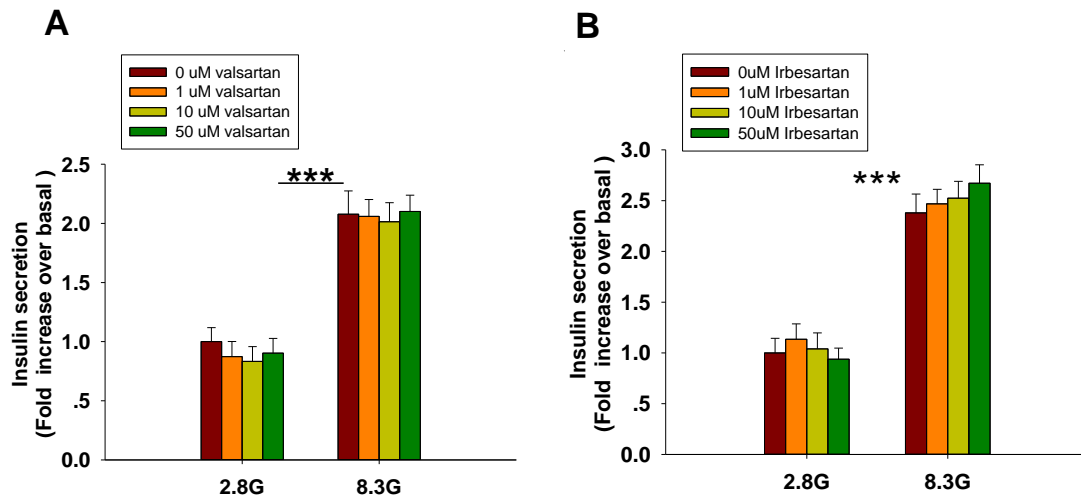

826

827 **Fig. S1:** Neither valsartan nor irbesartan potentiated insulin secretion in rat islets ( n = 7 tubes  
828 per group). (A) Rat islets were treated with various doses (1, 10, and 50  $\mu$ M) of valsartan under  
829 2.8 mM and 8.3 mM glucose (denoted as 2.8 G and 8.3 G) conditions. (B) Rat islets were  
830 treated with various doses (1, 10, and 50  $\mu$ M) of irbesartan under 2.8 mM and 8.3 mM glucose  
831 conditions. All results are normalized to basal secretion at 2.8G, and reported as the means  $\pm$   
832 SEM. Statistical differences among groups were compared using one-way analysis of variance  
833 (ANOVA) and Student–Newman–Keuls method post hoc analysis. \*\*\* P < 0.001.

834

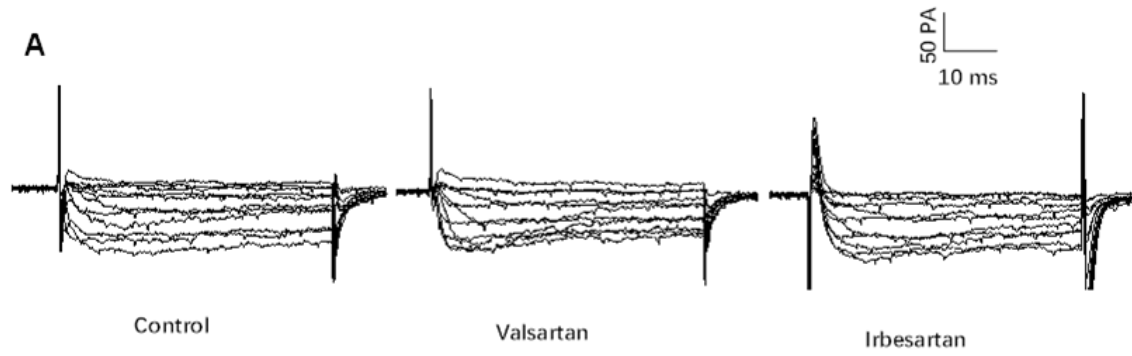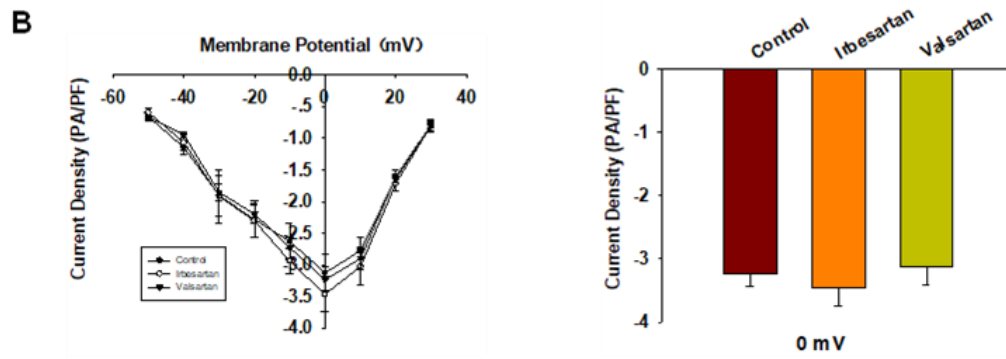

835

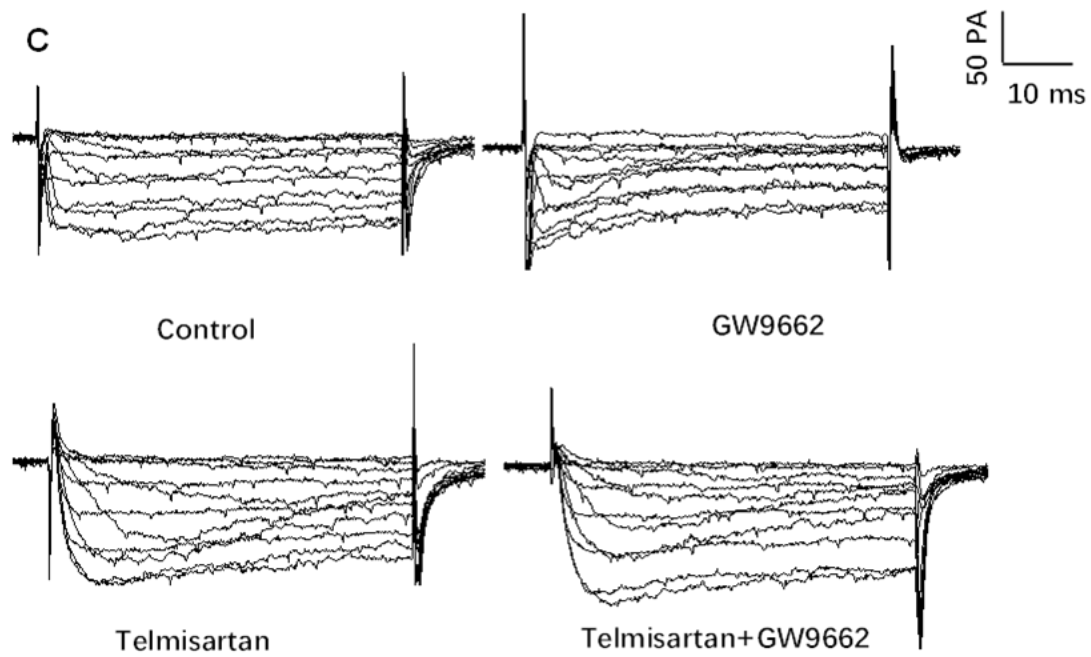

836

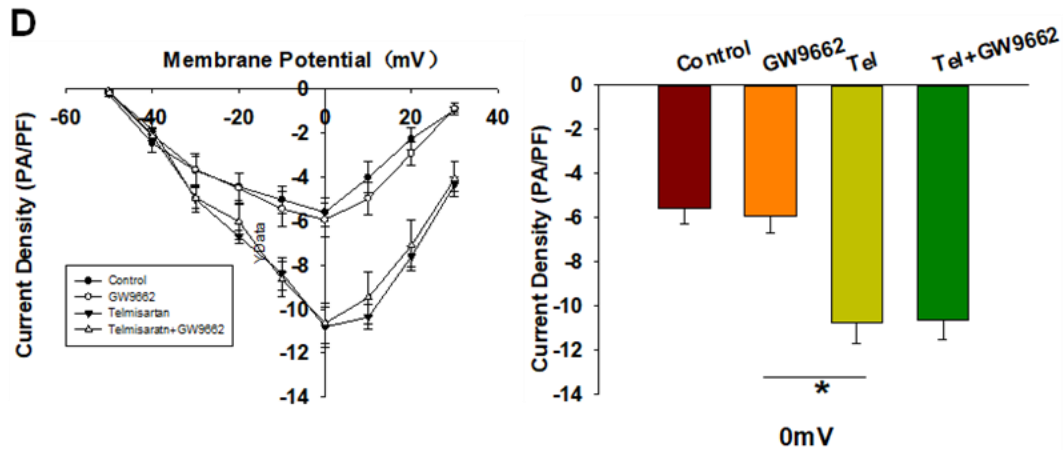

837

838 **Fig. S2:** The AT-1 receptor and PPAR $\gamma$  are not involved in telmisartan-induced  
839 activation of VGCCs. (A) Representative current traces recorded with treatment of  
840 valsartan (10  $\mu$ M) and irbesartan (10  $\mu$ M) in  $\beta$ -cells. (B) Current-voltage relationship  
841 curves and the summary of the mean Ca<sup>2+</sup> current density recorded at 0 mV  
842 depolarization (n = 7). (C) Representative current traces recorded under treatment of  
843 telmisartan (10  $\mu$ M) alone or in combination with GW9662 (10  $\mu$ M) in  $\beta$ -cells. (D)  
844 Current-voltage relationship curves and the summary of the mean Ca<sup>2+</sup> current density  
845 recorded at 0 mV depolarization (control, n = 10; GW9662, n = 6; telmisartan, n = 8;  
846 telmisartan+GW9662, n = 6). All results are reported as the means  $\pm$  SEM. Statistical  
847 differences among three or more groups were compared using one-way ANOVA. For  
848 comparing the effects of GW9662 groups, Dunn's method post hoc analysis was applied.

849 \*P < 0.05

850



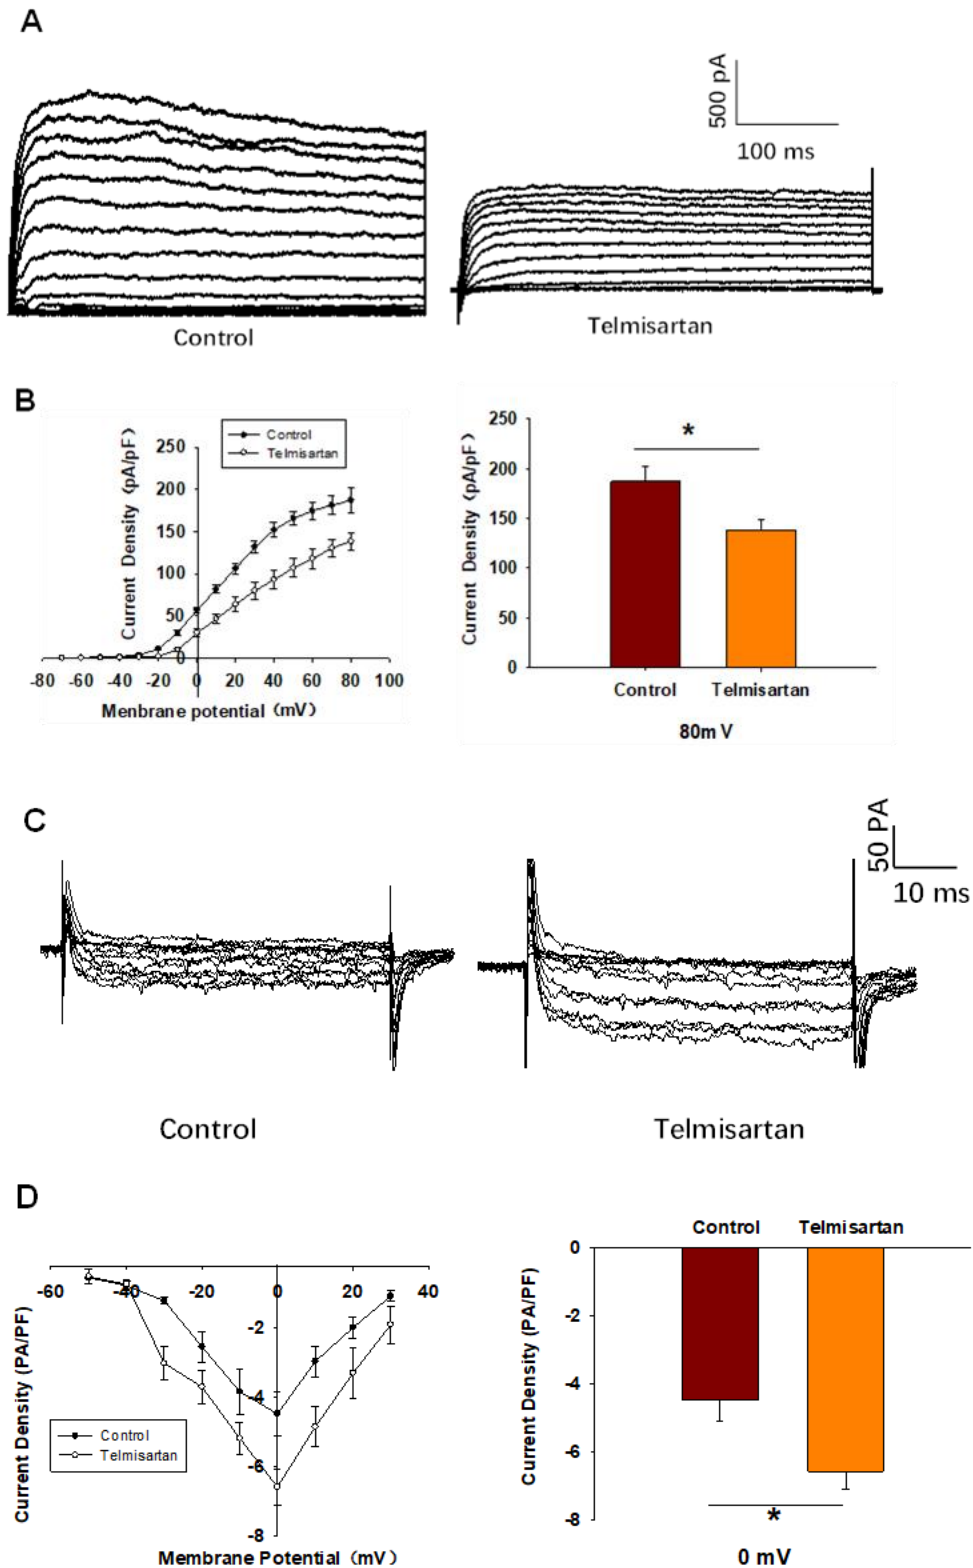

851

852

853 **Fig. S3:** Telmisartan exerts similar electrophysiological effects on  $\beta$ -cells of db/db mice.

854 (A) Representative Kv channels current traces recorded with treatment of telmisartan

855 (10  $\mu$ M) in  $\beta$ -cells. (B) Current-voltage relationship curves and the summary of the

856 mean current density of Kv channels recorded at 80 mV depolarization (n = 6). (C)

857 Representative Ca<sup>2+</sup> current traces recorded with treatment of telmisartan (10 μM) in

858 β-cells. (D) Current-voltage relationship curves and the summary of the mean Ca<sup>2+</sup>

859 current density recorded at 0 mV depolarization (control, n = 6; telmisartan, n = 7). All

860 results are reported as the means ± SEM. Statistical differences between two groups

861 were determined using an unpaired two-tailed Student's *t* test. \*P < 0.05.

862

863

864

865

866
